# Supplementary material for: Overall, gender and social inequalities in suicide mortality in Iran, 2006–2010: a time trend province-level study
Source: PubMed Central journal article supplement — BMJ Open. 2014 Aug 19;4(8):e005227. doi: 10.1136/bmjopen-2014-005227 (PMC4139655; doi:10.1136/bmjopen-2014-005227), 2014-08-19
Supplement: bmjopen-2014-005227.draft_revisions.pdf [file bmjopen-2014-005227.draft_revisions.pdf]

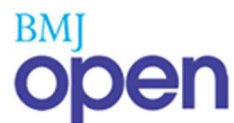

**PURE, GENDER AND SOCIAL INEQUALITIES IN SUICIDE  
MORTALITY IN IRAN, 2006-2010: A TIME TREND  
PROVINCE-LEVEL STUDY**

|                                    |                                                                                                                                            |
|------------------------------------|--------------------------------------------------------------------------------------------------------------------------------------------|
| Journal:                           | <i>BMJ Open</i>                                                                                                                            |
| Manuscript ID:                     | bmjopen-2014-005227                                                                                                                        |
| Article Type:                      | Research                                                                                                                                   |
| Date Submitted by the Author:      | 09-Mar-2014                                                                                                                                |
| Complete List of Authors:          | Kiadaliri, Aliasghar; Lund University,<br>Saadat, Soheil<br>Shahnavazi, Hossein<br>Haghparsast-Bidgoli, Hassan; University College London, |
| <b>Primary Subject<br>Heading</b>: | Sociology                                                                                                                                  |
| Secondary Subject Heading:         | Epidemiology, Health economics, Health policy, Mental health, Public health                                                                |
| Keywords:                          | Suicide mortality, Social inequality, Pure inequality, Temporal analysis,<br>Iran                                                          |
|                                    |                                                                                                                                            |

SCHOLARONE™  
Manuscripts

1  
2  
3  
4 **PURE, GENDER AND SOCIAL INEQUALITIES IN SUICIDE**  
5  
6  
7 **MORTALITY IN IRAN, 2006-2010: A TIME TREND**  
8  
9  
10 **PROVINCE-LEVEL STUDY**

11  
12  
13 Aliasghar A. Kiadaliri

14  
15 Address: Lund University, Department of Clinical Sciences, Malmö; Skane University Hospital;  
16 20502 Malmö, Sweden. Email: aliasghar.ahmad\_kiadaliri@med.lu.se

17  
18  
19 Tel: +46(0)40391425 Fax: +46(0)40391370  
20  
21

22  
23 Aliasghar A. Kiadaliri<sup>1,2</sup>, Soheil Saadat<sup>3</sup>, Hossein Shahnavaizi<sup>4</sup>, Hassan Haghparast-Bidgoli<sup>5</sup>  
24

- 25  
26 1. Health Economics Unit, Department of Clinical Sciences, Lund University, Lund, Sweden  
27  
28 2. Research Centre for Health Services Management, Institute for Futures Studies in Health, Kerman  
29 University of Medical Sciences, Kerman, Iran  
30  
31 3. Sina Trauma and Surgery Research Centre, Tehran University of Medical Sciences, Tehran, Iran  
32  
33 4. Iranian Forensic Medicine Organization, Tehran, Iran  
34  
35 5. Institute for Global Health, University College London, London, UK  
36  
37

38 **Running Title:** Inequalities in suicide mortality in Iran

39  
40 *Key words:* Suicide mortality, Social inequality, Pure inequality, Temporal analysis, Iran.  
41

42  
43 Word Count: 3125  
44  
45  
46  
47  
48  
49  
50  
51  
52  
53  
54  
55  
56  
57  
58  
59  
60

## Abstract

**Objectives:** Suicide is a major global health problem imposing a considerable burden on population in terms of disability-adjusted life years. There has been an increasing trend in fatal and attempted suicide in Iran over the past few decades. The aim of the current study was to assess pure, gender and social inequalities across Iran's provinces during 2006-2010.

**Design:** Ecological study.

**Setting:** The data on distribution of population at the provinces were obtained from the Statistical Centre of Iran. The data on the annual number of death caused by suicide in each province were gathered from the Iranian Forensic Medicine Organization.

**Methods:** Suicide mortality rate per 100,000 population was calculated. Human Development Index was used as the provinces' social rank. Gini coefficient, rate ratio and Kunst and Mackenbach relative index of inequality ( $RII_{KM}$ ) were used to assess pure, gender and social inequalities, respectively. Annual percentage change was calculated using Joinpoint regression.

**Results:** Suicide mortality has slightly increased in Iran during 2006-2010. There was a substantial and constant pure inequality across the country over the study period. Male to female rate ratio was 2.34 (95% CI 1.45-3.79) over the same period. There were social inequalities in suicide mortality in favor of people in better-off provinces. In addition, there was an increasing trend in these social disparities over time, although it was not statistically significant.

**Conclusion:** We found substantial pure, gender and social disparities in the distribution of suicide mortality across the provinces in Iran. The findings showed that men in the provinces with low socio-economic status are at higher risk of suicide mortality. Further analyses are needed to explain these disparities.

## Article Summary

### *Strength and limitations of this study*

- This is the first national study to evaluate regional social inequalities in suicide mortality over five-year period.
- Social inequality in suicide mortality was evaluated using Cuzick's test for trend and two common inequality measures: rate ratio (RR) and Kunst and Mackenbach relative index of inequality (RII<sub>KM</sub>)
- Age and gender differences between the provinces were naïvely adjusted which might have not fully captured differences in age distribution across provinces.

## Introduction

Suicide is considered as one of the three leading causes of death among 15 to 44 years age group and the second cause of death in 15-19 years age group <sup>1</sup>. It imposes a considerable burden on population in terms of disability-adjusted life year (DALY) and it has been projected that suicide will compose about 2.4% of global burden of diseases by 2020 <sup>2</sup>.

Similar to other developing countries, Iran has been experienced a rapid increase in suicide rate during recent years. A recent study showed that suicide and attempted suicide in Iran have increased from 8.3 per 100,000 population in 2001 to 16.3 in 2007 <sup>3</sup>. Moreover, suicide account for 4% of the injury cases admitted to the general hospitals in the country <sup>4</sup>.

The risk factors of suicide are consisted of some demographical characteristics <sup>5</sup>, socio-economic situations <sup>6</sup> and medical conditions <sup>7</sup>. However, there are factors related to the area of residence that influence the suicide rate <sup>8</sup>. Evidence demonstrates persistent geographical disparities in distribution of suicide between and within countries which support area-level correlates of suicide <sup>9</sup>.

Iran is a Middle Eastern country with 1,628,550 square kilometer land area <sup>10</sup> and is consisted of 31 provinces <sup>11</sup> that are in different levels of development. Ethnic groups tend to reside in neighboring provinces. Therefore, there are variations in socioeconomic level and ethnicity across provinces as well as geographical and ecological differences that could cause a disparity among suicide mortality rate.

1  
2  
3 While information on the individual risk factors and outcomes of suicide attempts have been  
4 well documented in previous studies in Iran<sup>3, 4, 12-15</sup>, there is little information on the role of  
5 socio-economic factors and suicide incidence. In particular, there is no known study  
6 evaluating regional socio-economic disparities and their impact on suicide rate in Iran.  
7  
8

9  
10 To fill the gap, this study aimed to describe pure and social inequality in suicide mortality  
11 rates across all the provinces in Iran from 2006 to 2010. Though this is an ecological study, it  
12 will provide a useful starting point for examining the social disparity of suicide and provide  
13 valuable information for policy makers in order to prioritize prevention strategies.  
14  
15  
16  
17  
18  
19  
20  
21  
22

## 23 **METHODS**

24  
25 The data on distribution of population at the provinces were obtained from the Statistical  
26 Centre of Iran. It should be noted that at the time of conducting the current study, Iran  
27 constituted of 30 provinces and it was later when Tehran province was split into two  
28 provinces. The data on the annual number of death caused by suicide in each province were  
29 gathered from the published reports<sup>16</sup> of Iranian Forensic Medicine Organization which is  
30 affiliated to the Judicial Authority in Iran. According to the Iranian law, all deaths due to  
31 external causes should be reported to this organization for examination and recording and to  
32 issue the death certificate. It is considered as the most reliable source of mortality data in Iran  
33<sup>17</sup>. Then, annual suicide mortality rates per 100,000 population were calculated for each  
34 province. Human Development Index (HDI) was used as the provinces' social rank and  
35 related data were obtained from the President Deputy of Strategic Planning and Control. The  
36 HDI is a composite index of three basic dimensions of human development, including life  
37 expectancy at birth, educational attainment (based on a combination of adult literacy rate and  
38 primary education to tertiary education enrolment rates), and income (based on GDP per head  
39 adjusted for purchasing-power parity [US\$])<sup>18</sup>. As a composite index, it is expected that HD  
40 might capture socioeconomic development more comprehensively than single indicators such  
41 as average income or expenditures.  
42  
43  
44  
45  
46  
47  
48  
49  
50  
51  
52  
53

54 Pure inequality was examined using Lorenz curve and Gini coefficient. These two measures  
55 are commonly used in assessing pure inequality in distribution of health care resources and  
56 outcomes<sup>19-21</sup>. Lorenz curve is used to compare distribution of health measure with perfect  
57  
58  
59  
60

1  
2  
3 equality (diagonal line). In the current study, Lorenz curve was plotted as the cumulative  
4 share of population ranked by suicide mortality rate, in an increasing order, against the  
5 cumulative share of suicide mortality. The further the distance from diagonal line implies the  
6 greater degree of inequality. The Gini coefficient is equal to twice the area between the  
7 Lorenz curve and diagonal and its value ranges from 0 (perfect equality) to one (maximum  
8 possible inequality). This measure takes into account the distribution of health variable across  
9 the entire population. In the current study, we used *fastgini* command in STATA to calculate  
10 Gini coefficient and its jackknife 95% confidence interval. To examine gender inequality, we  
11 calculated the male to female rate ratio and its 95% confidence interval using negative  
12 binomial regression with a robust variance. As we had only data stratified by sex groups for  
13 the whole study period and not for every specific year, an overall rate ratio was calculated.  
14  
15  
16  
17  
18  
19  
20

21  
22 Social inequality was evaluated using Cuzick's test for trend and two common inequality  
23 measures: rate ratio (RR) and Kunst and Mackenbach relative index of inequality ( $RII_{KM}$ )<sup>22</sup>.  
24 Cuzick's test for trend is an extension of the Wilcoxon rank-sum test and is used as a non-  
25 parametric test for trend across ordered groups<sup>23</sup>. To calculate RR, the provinces were ranked  
26 and divided in five quintiles by HDI (weighted by their population). Then, negative binomial  
27 regression with a robust variance was used to calculate RR and its 95% confidence interval to  
28 compare the highest versus the lowest quintile. One problem with RR is that it only considers  
29 the population in two extreme socioeconomic groups. To take into account the whole  
30 population distribution across socioeconomic groups and also to remove differences in the  
31 size of socioeconomic groups, as a source of variation in the magnitude of health inequalities,  
32  $RII_{KM}$  was calculated<sup>22</sup>.  $RII$  is widely used to measure social inequality and is recommended  
33 when making comparisons over time or across populations<sup>24</sup>. To calculate  $RII$ , after  
34 determine the relative position of the population in the provinces ranked by HDI, the number  
35 of deaths in the provinces was regressed on these relative ranks using negative binomial  
36 regression with a robust variance and population as offset variable. With the lowest social  
37 rank as reference, an  $RII_{KM}$  value greater (lesser) than 1 show that suicide mortality rate was  
38 higher among the provinces with higher (lower) social rank (more distance from 1 implies  
39 more inequality)<sup>20</sup>. To account for sex and age differences between the provinces, we also  
40 estimated adjusted  $RII_{KM}$  by including proportion of male in population, mean age of females  
41 and mean age of males in our negative binomial regression.  
42  
43  
44  
45  
46  
47  
48  
49  
50  
51  
52  
53  
54

55  
56 To examine temporal changes of suicide mortality rate across the provinces and also across  
57 the quintiles of HDI, we calculated annual percentage change (APC) and its 95% confidence  
58  
59  
60

1  
2  
3 interval for each province and quintile using the Joinpoint Regression Program 3.5.4.  
4 Moreover, this program was used to calculate APC of pure and socioeconomic inequality  
5 measures over study period. APC is estimated using following regression:  
6  
7

$$\text{Ln}(I_t) = b_0 + b_1(t)$$

$$APC = (e^{b_1} - 1) \times 100$$

8  
9  
10  
11  
12  
13  
14 Where  $I_t$  shows the suicide mortality rate and estimated inequality indices for year  $t$ .

15  
16 In a sensitivity analysis, Tehran was excluded from the analysis to examine the pure, gender  
17 and social inequalities across the remaining provinces. The reason for this was that Tehran  
18 has special situation as the capital of the country and being the centre of economic, social and  
19 political activities. Excel office and STATA version 11 (StataCorp LP, College Station, TX,  
20 USA) were used for statistical analysis.  
21  
22  
23  
24  
25  
26  
27

## 28 Results

29  
30 Table 1 shows mean population, HDI, suicide mortality rate and APC (%) across the  
31 provinces for years 2006-2010. Ilam and Hormozgan provinces had the highest and the  
32 lowest suicide mortality rate during the study period, respectively (8.8-fold difference). Most  
33 provinces (56.6%) had a suicide mortality rate of 3 to 6 per 100,000 population. In addition,  
34 suicide mortality rate was more prevalent among the western provinces of Iran.  
35  
36  
37  
38

39  
40 The estimated APC values show that only five provinces experienced significant changes in  
41 suicide mortality rate over the study period (significant increases in Ilam, Isfahan, North  
42 Khorasan and Tehran provinces and significant decrease in Markazi province).  
43  
44

45  
46 Figure 1a shows temporal changes of suicide mortality rate for the country. While the graph  
47 shows a slight increase in suicide mortality rate over the study period (from 4.25 in 2006 to  
48 4.88 in 2010), this was not statistically significant (APC=3.05%, P=0.23). Figure 1b presents  
49 suicide mortality rates for five quintiles of HDI and examining the trends showed that APC  
50 was significant only in the highest quintile (APC=17.98, P=0.01). Figure 2 shows scatter  
51 graphs of HDI and suicide mortality rates. It is evident that the higher HDI was associated  
52 with the lower suicide mortality rate and Cuzick's test confirmed this (Z=-4.61, P<0.011).  
53  
54  
55  
56  
57  
58  
59  
60

1  
2  
3 Male to female rate ratio was 2.34 (95% CI 1.45-3.79) implying a significant higher suicide  
4 mortality rate among males than females over the study period. Examining this ratio in the  
5 provinces showed that in all provinces but Kordestan men had a higher suicide mortality rate  
6 than women. Excluding Tehran from the sample did not change this finding (2.33; 95% CI  
7 1.43-3.79).  
8  
9

10  
11 Table 2 presents the pure and social inequality measures in distribution of suicide mortality  
12 rate across the country through 2006-2010. The Gini coefficient ranged from 0.248 to 0.302  
13 implying substantial pure inequality across the provinces. The Lorenz curves corresponded to  
14 this Gini coefficient is been shown in Figure 3. There was a 14.5% decrease in Gini  
15 coefficient between the first year and the last year of study implying decreasing pure  
16 inequality between these two points of time. Over the study period, the APC of Gini  
17 coefficient was -4.28 and statistically non-significant. Excluding Tehran resulted in a 6.9%  
18 increase in Gini coefficient between the first and the last year of the study period and a  
19 statistically non-significant APC of 1.42 was estimated.  
20  
21  
22  
23  
24  
25  
26

27  
28 RR was significantly lower than 1 in overall and for all years of the study period, implying a  
29 higher suicide mortality rate among people in the lowest quintile of HDI compared with the  
30 highest one. Over the study period, RR was approaching 1 and the APC of RR was 12.20 and  
31 statistically significant implying a decrease in the gap between the highest and the lowest  
32 social ranks. Although excluding Tehran from the sample did not change the overall picture  
33 of social inequality, an inverse trend (increasing social inequality) was observed.  
34  
35  
36  
37

38  
39 RII<sub>KM</sub> was also lower than 1 in overall and for all years of the study, showing a persistent  
40 inequality in favor of people living in the provinces with higher social rank. Temporal  
41 analysis showed that RII<sub>KM</sub> did not significantly change over the study period. Adjusting for  
42 age and sex this observation. When we excluded the Tehran province, the APC value for  
43 adjusted RII<sub>KM</sub> was statistically significant showing an increase in social disparity across the  
44 remaining provinces in Iran.  
45  
46  
47  
48

## 49 Discussion

50  
51  
52 In this study, for the first time, we assessed pure and social disparities in the distribution of  
53 suicide mortality across the provinces of Iran over a period of five years (2006-2010). The  
54 findings showed that suicide mortality has slightly increased over the study period. The  
55 findings also indicated that there were substantial pure, gender and social disparities in the  
56  
57  
58  
59  
60



1  
2  
3 distribution of suicide mortality across the country, and it was higher in the provinces with  
4 lower social rank. These disparities were generally stable and persistent over the study  
5 period.  
6  
7

8  
9 The findings from the current study showed an inverse association between the provinces'  
10 social rank and suicide mortality in Iran. Although the studies on association between area  
11 social rank and suicide mortality reported mixed results<sup>9, 25</sup>, the results of this study is in line  
12 with previous ecological studies investigating the relationship between socioeconomic  
13 characteristics and suicide rate, in particular the studies focused on high income settings<sup>9, 26-</sup>  
14<sup>32</sup>. Rehkopf and Buka<sup>9</sup> in their systematic review of suicide and socioeconomic  
15 characteristics of geographical areas found that, among studies with statistically significant  
16 results, 50% and 73% of studies reported an inverse relation between area income and  
17 education characteristics and completed suicide, respectively. They also found that the  
18 probability of reporting an inverse relationship between area social rank and suicide mortality  
19 was higher among the studies conducted in Asia (94% of studies with statistically significant  
20 results)<sup>9</sup>. Similar finding was reported by another study<sup>33</sup> focusing on the countries in  
21 Eastern Mediterranean region (where Iran is located), indicating that high income countries  
22 had lower suicide mortality rate than their low and middle income counterparts. It is argued  
23 that people in the provinces with lower social rank generally have more adverse experiences,  
24 poorer mental health, lower access to psychiatric services, and lower access to health  
25 facilities. These factors might partly explain higher suicide mortality rate in the provinces  
26 with lower social rank in Iran.  
27  
28  
29  
30  
31  
32  
33  
34  
35  
36  
37  
38

39  
40 The four Western provinces of Iran (i.e., Ilam, Kermanshah, Lorestan and Hamedan) had the  
41 highest suicide mortality rate in the country. One potential explanation for this observation  
42 can be low socioeconomic status of these provinces. These provinces are among the  
43 provinces with the highest unemployment rate and the lowest HDI in the country. High  
44 divorce rates in these provinces (except for Ilam) can be another potential explanation. A  
45 recent study has reported divorce as one of the risk factors for completed suicides in Iran<sup>3</sup>. In  
46 addition, cultural issues such as the tribal structure of communities and the extreme  
47 fanaticism prevailing in these provinces have been considered as another potential  
48 explanation for this finding<sup>34</sup>.  
49  
50  
51  
52  
53  
54

55  
56 The high gender gap in suicide mortality rate observed in the current study is in line with the  
57 previous epidemiological studies in Iran<sup>3, 4, 14</sup> and is comparable to the studies conducted in  
58  
59  
60

1  
2  
3 other settings, in particular high income countries<sup>6, 9, 35, 36</sup>. Although many studies, including  
4 the previous studies in Iran<sup>3, 4, 14</sup>, have shown higher suicide attempt rate among females,  
5 completed (fatal) suicides are higher among males. One potential explanation can be the  
6 difference in methods of attempting suicide among males and females. For example, the most  
7 common methods of attempting suicide used by males in Iran are hanging and firearms which  
8 have higher fatality rate compared with self-burning method commonly used by females<sup>3, 14,</sup>  
9 <sup>36, 37</sup>. Greater psychosocial impact of problems, such as unemployment or retirement, on  
10 males compared to female<sup>36, 38, 39</sup> and adopting coping strategies such as emotional  
11 inexpressiveness, lack of help-seeking, risk-taking behaviour, violence, alcohol and drug  
12 abuse by males (which are triggered by norms of traditional masculinity)<sup>40, 41</sup> are other  
13 potential factors which have been discussed in the literature.  
14  
15  
16  
17  
18  
19  
20

21  
22 Temporal analysis of suicide mortality showed interesting results indicating that among five  
23 quintiles of HDI, it was only the highest quintile that experienced a significant change in  
24 suicide mortality over the study period. This finding potentially can be explained by  
25 increasing prevalence of mental disorders, raising unemployment rate<sup>13, 42</sup> and increasing  
26 trend in divorce rate<sup>13</sup> in the provinces with higher HDI, such as Tehran, the capital city of  
27 Iran.  
28  
29  
30  
31  
32

33 The current study has several limitations that should be considered when interpreting its  
34 findings. Firstly, age and gender differences between the provinces were naïvely adjusted  
35 which might have not fully captured differences in age distribution across provinces.  
36 Secondly, there is the issue of availability and quality of data on suicide which is common in  
37 developing countries settings<sup>25, 43</sup> and leads to underestimation and misclassification of  
38 suicide. This might be an issue in this study because of the social stigma of suicide and  
39 religious sanctions and some legal issues in the Iranian context<sup>33, 4</sup>. Moreover, the  
40 underestimation and misclassification of suicide mortality might be more common in the  
41 provinces with lower social rank; therefore, we expect that the social disparity to be more  
42 profound than what has been reported here. Thirdly, the current study is an ecological study  
43 using province as unit of analysis which embraces substantial heterogeneity within provinces.  
44 This implies that the observed disparities in suicide mortality are between-provinces and it is  
45 not necessarily applicable to smaller geographic units or individuals. Furthermore, no causal  
46 inference can be drawn due to ecological nature of the study and that there was no control for  
47 confounders in this study.  
48  
49  
50  
51  
52  
53  
54  
55  
56  
57  
58  
59  
60

## Conclusion

The present study indicated that there were substantial pure, gender and social disparities in the distribution of suicide mortalities across the provinces in Iran. Moreover, the study showed an inverse association between the provinces' social rank and suicide mortality. The findings imply that prevention resources should be targeted high risk groups, in particular men in the provinces with low socio-economic status. Further investigations are needed to explain these disparities in suicide mortality across the provinces. Moreover, more studies needed to explore the association of socio-economic factors and suicide (attempt and fatal) focusing on the smaller geographical units and at the individual level in order to design better prevention strategies.

## List of Abbreviations

DALY: Disability-adjusted Life Years, HDI: Human Development Index, RR: rate ratio,  $RII_{KM}$ : Kunst and Mackenbach relative index of inequality, APC: annual percentage change

**Authors' contributions**

AAK was involved in the study conception and design, data collection and analysis, interpretation of the data, and writing the manuscript. HHB and SS were involved in the study design, results interpretation, and writing the manuscript. HS was involved in the study design, data collection and finalization of the manuscript. All authors read and approved the final manuscript

**Competing interests**

The authors declare that they have no competing interests. No funding has been received for the conduct of this study and/or preparation of this manuscript.

**Data sharing statement**

No additional data

## References

1. Patton GC, Coffey C, Sawyer SM, Viner RM, Haller DM, Bose K, Vos T, Ferguson J, Mathers CD: Global patterns of mortality in young people: a systematic analysis of population health data. *Lancet* 2009, 374:881-892.
2. Bertolote JM, Fleischmann A: A Global Perspective On the Magnitude of Suicide Mortality. In *Oxford Textbook of Suicidology and Suicide Prevention: a global perspective*. Oxford University Press; 2009: 91-98
3. Saberi-Zafaghandi MB, Hajebi A, Eskandarieh S, Ahmadzad-Asl M: Epidemiology of suicide and attempted suicide derived from the health system database in the Islamic Republic of Iran: 2001-2007. *Eastern Mediterranean health journal* 2012, 18:836-841.
4. Sharif-Alhoseini M, Rasouli MR, Saadat S, Haddadi M, Gooya MM, Afsari M, Rahimi-Movaghar V: Suicide attempts and suicide in Iran: results of national hospital surveillance data. *Public health* 2012.992-126:990 ,
5. WHO (2012). *Public health action for the prevention of suicide: a framework*. World Health Organization, Geneva.
6. Pompili M, Innamorati M, Vichi M, Masocco M, Vanacore N, Lester D, Serafini G, Tatarelli R, De Leo D, Girardi P: Inequalities and impact of socioeconomic-cultural factors in suicide rates across Italy. *Crisis* 2011, 32:178-185.
7. Ikeda RM, Kresnow MJ, Mercy JA, Powell KE, Simon TR, Potter LB, Durant TM, Swahn MH: Medical conditions and nearly lethal suicide attempts. *Suicide Life-Threat* 2001, 32:60-67.
8. Hirsch JK: A review of the literature on rural suicide: risk and protective factors, incidence, and prevention. *Crisis* 2006, 27:189-199.-
9. Rehkopf DH, Buka SL: The association between suicide and the socio-economic characteristics of geographical areas: a systematic review. *Psychol Med* 2006, 36:145-157.
10. World Bank (2013). Islamic Republic of Iran. <http://data.worldbank.org/country/iran-islamic-republic>. Accessed 15.09.2013.
11. Statistical Center of Iran (2013). Iran at a glance. <http://www.amar.org.ir/Default.aspx?tabid=1321>. Accessed 15.09.2013
12. Farzaneh E, Mehrpour O, Alfred S, Moghaddam HH, Behnoush B, Seghatoleslam T: Self-poisoning suicide attempts among students in Tehran, Iran. *Psychiatria Danubina* 2010, 22:34-38.
13. Nazarzadeh M, Bidel Z, Ayubi E, Asadollahi K, Carson KV, Sayehmiri K: Determination of the social related factors of suicide in Iran: a systematic review and meta-analysis. *BMC public health* 2013, 13:4.
14. Shirazi HR, Hosseini M, Zoladl M, Malekzadeh M, Momeninejad M, Noorian K, Mansorian MA: Suicide in the Islamic Republic of Iran: an integrated analysis from 1981 to 2007. *Eastern Mediterranean health journal* 2012, 18:607-613.
15. Taghaddosinejad F, Sheikhezadi A, Behnoush B, Reshadati J, Sabery SH: A survey of suicide by burning in Tehran, Iran. *Acta medica Iranica* 2010, 4.272-8:266
16. Khademi A, Moradi S: *Statistical Investigation of Unnatural Deaths in Iran (2001-2010)*. Forensic Medicine Organization, Tehran,Iran.
17. Montazeri A :Road-traffic-related mortality in Iran: a descriptive study. *Public health* 2004, 118:110-113.

18. United Nations Development Program: Human Development Index (HDI). <http://hdr.undp.org/en/statistics/hdi/> accessed 01December 2013.
19. Ahmad Kiadaliri A, Najafi B, Haghparast-Bidgoli H: Geographic distribution of need and access to health care in rural population: an ecological study in Iran. *International journal for equity in health* 2011, 10:39.
20. Kiadaliri AA, Hosseinpour R, Haghparast-Bidgoli H, Gerdtham UG: Pure and social disparities in distribution of dentists: a cross-sectional province-based study in Iran. *International journal of environmental research and public health* 2013, 10:1882-1894.
21. Shen J, Wildman J, Steele J: Measuring and decomposing oral health inequalities in an UK population. *Community Dent Oral Epidemiol* 2013, 41:481-489.
22. Mackenbach JP, Kunst AE: Measuring the magnitude of socio-economic inequalities in health: an overview of available measures illustrated with two examples from Europe. *Soc Sci Med* 1997, 44:757-771.
23. Cuzick J: A Wilcoxon-type test for trend. *Stat Med* 1985, 4:87-90.
24. Cavelaars AE, Kunst AE, Geurts JJ, Crialesi R, Grotvedt L, Helmert U, Lahelma E, Lundberg O, Matheson J, Mielck A, et al: Educational differences in smoking: international comparison. *BMJ* 2000, 320:1102-1107.
25. Bando DH, Brunoni AR, Bensenor IM, Lotufo PA: Suicide rates and income in Sao Paulo and Brazil: a temporal and spatial epidemiologic analysis from 1996 to 2008. *BMC psychiatry* 2012, 12:127.
26. Chang SS, Sterne JA, Wheeler BW, Lu TH, Lin JJ, Gunnell D: Geography of suicide in Taiwan: spatial patterning and socioeconomic correlates. *Health & place* 2011, 17:641-650.
27. Fukuda Y, Nakamura K, Takano T: Cause-specific mortality differences across socioeconomic position of municipalities in Japan, 1973-1977 and 1993-1998: increased importance of injury and suicide in inequality for ages under 75. *International journal of epidemiology* 2005, 34:100-109.
28. Martiello MA, Giacchi MV: Ecological study of isolation and suicide in Tuscany (Italy). *Psychiatry research* 2012, 198:68-73.
29. Rezaeian M, Dunn G, St Leger S, Appleby L: Ecological association between suicide rates and indices of deprivation in the north west region of England: the importance of the size of the administrative unit. *Journal of epidemiology and community health* 2006, 60:956-961.
30. Taylor R, Page A, Morrell S, Harrison J, Carter G: Mental health and socio-economic variations in Australian suicide. *Soc Sci Med* 2005, 61:1551-1559.
31. Tondo L, Albert MJ, Baldessarini RJ: Suicide rates in relation to health care access in the United States :an ecological study. *The Journal of clinical psychiatry* 2006, 67:517-523.
32. Ying YH, Chang K: A study of suicide and socioeconomic factors. *Suicide & life-threatening behavior* 2009, 39:214-226.
33. Rezaeian M: Age and sex suicide rates in the Eastern Mediterranean Region based on global burden of disease estimates for 2000. *Eastern Mediterranean health journal* 2007, 13:953-960.
34. Aliverdinia A, Pridemore WA: Women's fatalistic suicide in Iran: a partial test of Durkheim in an Islamic Republic. *Violence Against Women* 2009, 15:307-320.

- 1
- 2
- 3 35. Cleary A: Suicidal action, emotional expression, and the performance of
- 4 masculinities. *Soc Sci Med* 2012, 74:498-505.
- 5
- 6 36. Cheong KS, Choi MH, Cho BM, Yoon TH, Kim CH, Kim YM, Hwang IK: Suicide rate
- 7 differences by sex, age, and urbanicity, and related regional factors in Korea. *Journal*
- 8 *of preventive medicine and public health = Yebang Uihakhoe chi* 2012, 45:70-77.
- 9
- 10 37. Shojaei A, Moradi S, Alaeddini F, Khodadoost M, Barzegar A, Khademi A: Association
- 11 between suicide method, and gender, age, and education level in Iran over 2006-
- 12 2010. *Asia Pac Psychiatry* 2013. DOI: 10.1111/appy.12097
- 13
- 14 38. Qin P, Agerbo E, Mortensen PB: Suicide risk in relation to socioeconomic,
- 15 demographic, psychiatric, and familial factors: A national register-based study of all
- 16 suicides in Denmark, 1981-1997. *Am J Psychiat* 2003, 160:765-772.
- 17
- 18 39. Qin P, Agerbo E, Westergaard-Nielsen N, Eriksson T, Mortensen PB: Gender
- 19 differences in risk factors for suicide in Denmark. *The British journal of psychiatry :*
- 20 *the journal of mental science* 2.550-177:546 ,000
- 21
- 22 40. Hawton K: Sex and suicide - Gender differences in suicidal behaviour. *Brit J Psychiat*
- 23 2000, 177:484-485.
- 24
- 25 41. Moller-Leimkuhler AM: The gender gap in suicide and premature death or: why are
- 26 men so vulnerable? *European archives of psychiatry and clinical neuroscience* 2003,
- 27 253:1-8.
- 28
- 29 42. Sheikholeslami H, Kani C, Ziaee A: Attempted suicide among Iranian population.
- 30 *Suicide Life-Threat* 2008, 38:456-466.
- 31
- 32 43. Vijayakumar L, Nagaraj K, Pirkis J, Whiteford H: Suicide in developing countries :(1)
- 33 frequency, distribution, and association with socioeconomic indicators. *Crisis* 2005,
- 34 26:104-111.
- 35
- 36
- 37
- 38
- 39
- 40
- 41
- 42
- 43
- 44
- 45
- 46
- 47
- 48
- 49
- 50
- 51
- 52
- 53
- 54
- 55
- 56
- 57
- 58
- 59
- 60



Table 1. Mean population, human development index (HDI), suicide mortality rate and annual percentage change across the provinces in Iran, 2006-2010 (Ranked by Suicide mortality rate).

|                         | Population | HDI   | Suicide mortality rate per 100,000 population | APC (%)*      |
|-------------------------|------------|-------|-----------------------------------------------|---------------|
| Ilam                    | 555,929    | 0.729 | 19.53                                         | <b>10.11</b>  |
| Kermanshah              | 1,892,100  | 0.748 | 13.74                                         | 0.46          |
| Lorestan                | 1,736,946  | 0.761 | 10.64                                         | 1.18          |
| Hamedan                 | 1,700,960  | 0.740 | 9.59                                          | -1.52         |
| Gilan                   | 2,428,553  | 0.769 | 6.52                                          | 9.98          |
| Ardebil                 | 1,235,234  | 0.735 | 6.22                                          | -2.32         |
| East Azerbaijan         | 3,646,459  | 0.763 | 5.58                                          | 1.31          |
| Zanjan                  | 973,739    | 0.752 | 5.53                                          | 12.14         |
| Kohgiluyeh & Boyerahmad | 651,577    | 0.718 | 5.25                                          | -4.20         |
| Khuzestan               | 4,372,242  | 0.762 | 5.11                                          | -7.13         |
| West Azerbaijan         | 2,944,224  | 0.713 | 4.72                                          | -2.74         |
| Kordestan               | 1,453,503  | 0.713 | 4.69                                          | 5.25          |
| Golestan                | 1,651,708  | 0.737 | 4.49                                          | 5.67          |
| Overall (Iran)          | 72,599,045 | 0.758 | 4.46                                          | 3.05          |
| Qazvin                  | 1,177,582  | 0.783 | 4.25                                          | -1.13         |
| North Khorasan          | 824,979    | 0.759 | 4.24                                          | <b>10.64</b>  |
| Fars                    | 4,431,684  | 0.783 | 4.16                                          | 1.56          |
| Chaharmahal Bakhtiari   | 875,207    | 0.749 | 4.00                                          | -7.72         |
| Qom                     | 1,087,011  | 0.773 | 3.75                                          | 7.89          |
| Mazandaran              | 2,979,189  | 0.745 | 3.66                                          | -5.71         |
| Isfahan                 | 4,680,831  | 0.810 | 3.64                                          | <b>4.62</b>   |
| Kerman                  | 2,799,417  | 0.750 | 3.10                                          | -5.03         |
| Bushehr                 | 914,710    | 0.786 | 3.02                                          | 15.55         |
| South Khorasan          | 656,469    | 0.723 | 3.02                                          | -2.28         |
| Tehran                  | 14,106,297 | 0.843 | 2.92                                          | <b>17.98</b>  |
| Yazd                    | 1,028,152  | 0.809 | 2.68                                          | -4.48         |
| Razavi Khorasan         | 5,765,706  | 0.777 | 2.66                                          | -2.64         |
| Semnan                  | 606,982    | 0.814 | 2.60                                          | 4.27          |
| Markazi                 | 1,371,514  | 0.785 | 2.38                                          | <b>-10.73</b> |
| Sistan & Baluchestan    | 2,569,107  | 0.643 | 2.23                                          | 6.11          |
| Hormozgan               | 1,481,031  | 0.766 | 2.21                                          | -5.59         |

\*Bold figures show statistically significant results (p<0.05)



Table 2. Pure and social inequality measures of suicide mortality in Iran, 2006-2010.

|                                | Total sample (n=30) |                     |                     |                     |                     |                     | APC (Pvalue)   |
|--------------------------------|---------------------|---------------------|---------------------|---------------------|---------------------|---------------------|----------------|
|                                | 2006                | 2007                | 2008                | 2009                | 2010                | Overall             |                |
| Gini index                     | 0.290 (0.193-0.386) | 0.302 (0.212-0.392) | 0.271 (0.182-0.361) | 0.268 (0.165-0.371) | 0.248 (0.151-0.345) | 0.281 (0.240-0.322) | -4.28 (0.050)  |
| Rate ratio*                    | 0.359 (0.256-0.503) | 0.325 (0.225-0.469) | 0.428 (0.284-0.646) | 0.496 (0.296-0.830) | 0.535 (0.316-0.906) | 0.426 (0.275-0.659) | 12.20 (0.049)  |
| RII <sub>KM</sub>              | 0.345 (0.174-0.686) | 0.257 (0.127-0.521) | 0.289 (0.142-0.588) | 0.337 (0.147-0.776) | 0.341 (0.148-0.784) | 0.339 (0.166-0.671) | 1.75 (0.745)   |
| Adjusted RII <sub>KM</sub> **  | 0.279 (0.129-0.600) | 0.205 (0.098-0.431) | 0.224 (0.102-0.489) | 0.133 (0.039-0.455) | 0.160 (0.051-0.507) | 0.171 (0.054-0.548) | -13.75 (0.073) |
| Sample excluding Tehran (n=29) |                     |                     |                     |                     |                     |                     |                |
| Gini index                     | 0.259 (0.168-0.350) | 0.285 (0.187-0.382) | 0.282 (0.187-0.378) | 0.292 (0.192-0.392) | 0.277 (0.191-0.363) | 0.282 (0.243-0.322) | 1.42 (0.38)    |
| Rate ratio*                    | 0.646 (0.444-0.938) | 0.397 (0.226-0.695) | 0.415 (0.247-0.696) | 0.520 (0.277-0.974) | 0.492 (0.262-0.924) | 0.584 (0.380-0.896) | -6.59 (0.403)  |
| RII <sub>KM</sub>              | 0.460 (0.257-0.823) | 0.339 (0.179-0.644) | 0.352 (0.185-0.672) | 0.397 (0.187-0.839) | 0.389 (0.185-0.819) | 0.411 (0.215-0.785) | -2.76 (0.575)  |
| Adjusted RII <sub>KM</sub> **  | 0.402 (0.224-0.722) | 0.301 (0.168-0.541) | 0.310 (0.165-0.580) | 0.211 (0.077-0.577) | 0.241 (0.093-0.623) | 0.241 (0.090-0.649) | -12.95 (0.045) |

\*The highest vs. the lowest quintile of HDI

\*\*Adjusted for proportion of males and mean age of males and females in the provinces.

1  
2  
3 **Figure 1.** Suicide mortality rates per 100,000 populations in a) total sample; b) quintiles of  
4 HDI, 2006-2010.  
5

6  
7 **Figure 2.** Scatter plots of HDI and suicide mortality rates, stratified by year of study.  
8

9  
10 **Figure 3.** Lorenz curves of the distribution of suicide mortality in Iran, 2006-2010.  
11  
12  
13  
14  
15  
16  
17  
18  
19  
20  
21  
22  
23  
24  
25  
26  
27  
28  
29  
30  
31  
32  
33  
34  
35  
36  
37  
38  
39  
40  
41  
42  
43  
44  
45  
46  
47  
48  
49  
50  
51  
52  
53  
54  
55  
56  
57  
58  
59  
60

For peer review only

1  
2  
3  
4  
5  
6  
7  
8  
9  
10  
11  
12  
13  
14  
15  
16  
17  
18  
19  
20  
21  
22  
23  
24  
25  
26  
27  
28  
29  
30  
31  
32  
33  
34  
35  
36  
37  
38  
39  
40  
41  
42  
43  
44  
45  
46  
47  
48  
49  
50  
51  
52  
53  
54  
55  
56  
57  
58  
59  
60

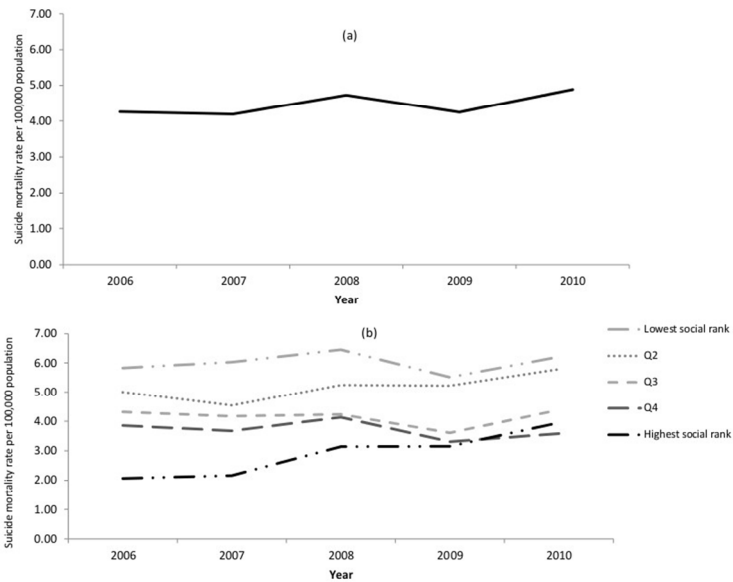

93x71mm (300 x 300 DPI)

Review only

1  
2  
3  
4  
5  
6  
7  
8  
9  
10  
11  
12  
13  
14  
15  
16  
17  
18  
19  
20  
21  
22  
23  
24  
25  
26  
27  
28  
29  
30  
31  
32  
33  
34  
35  
36  
37  
38  
39  
40  
41  
42  
43  
44  
45  
46  
47  
48  
49  
50  
51  
52  
53  
54  
55  
56  
57  
58  
59  
60

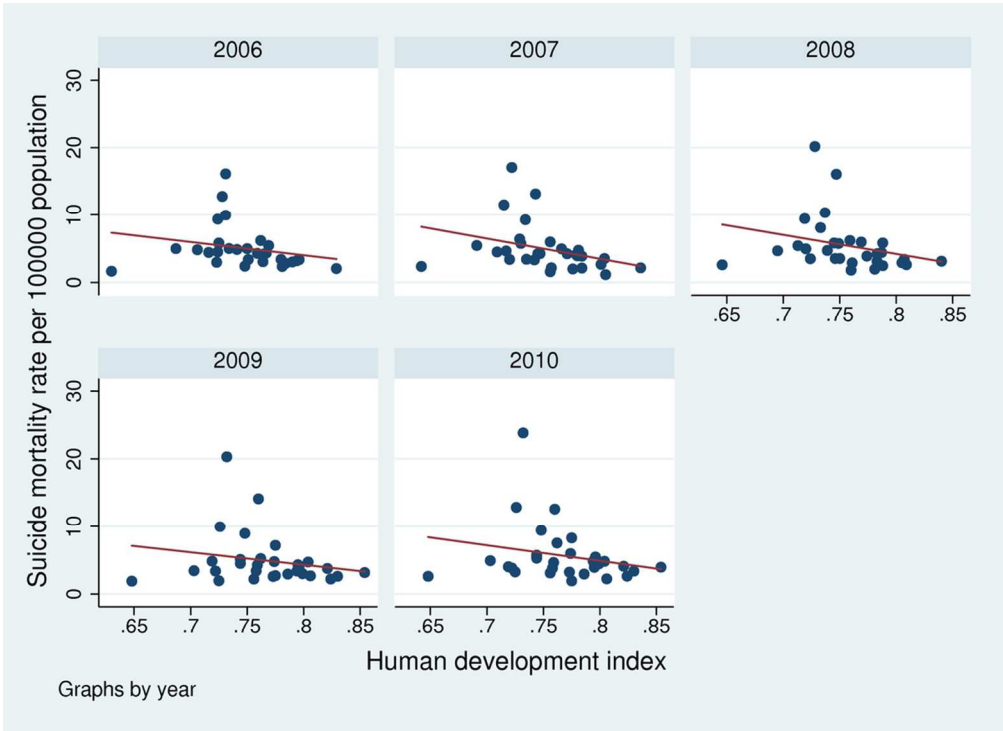

101x73mm (300 x 300 DPI)

View only

1  
2  
3  
4  
5  
6  
7  
8  
9  
10  
11  
12  
13  
14  
15  
16  
17  
18  
19  
20  
21  
22  
23  
24  
25  
26  
27  
28  
29  
30  
31  
32  
33  
34  
35  
36  
37  
38  
39  
40  
41  
42  
43  
44  
45  
46  
47  
48  
49  
50  
51  
52  
53  
54  
55  
56  
57  
58  
59  
60

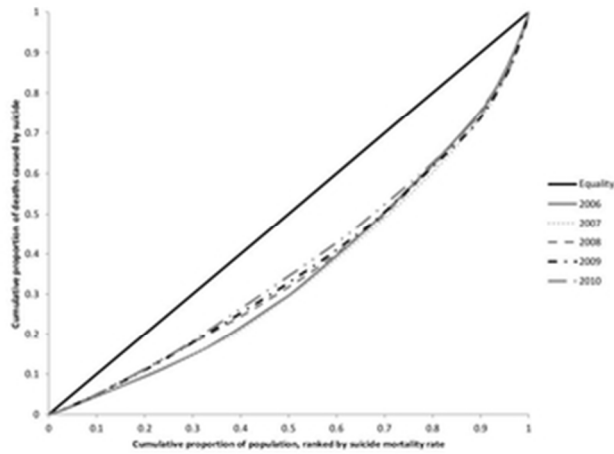

35x27mm (300 x 300 DPI)

Review only

## STROBE Statement—checklist of items that should be included in reports of observational studies

|                              | Item No  | Recommendation                                                                                                                                                                                                                                                                                                                                                                                                                                                                                                                                                                                                                                                                                   |
|------------------------------|----------|--------------------------------------------------------------------------------------------------------------------------------------------------------------------------------------------------------------------------------------------------------------------------------------------------------------------------------------------------------------------------------------------------------------------------------------------------------------------------------------------------------------------------------------------------------------------------------------------------------------------------------------------------------------------------------------------------|
| <b>Title and abstract</b>    | <b>1</b> | (a) Indicate the study's design with a commonly used term in the title or the abstract<br>(b) Provide in the abstract an informative and balanced summary of what was done and what was found                                                                                                                                                                                                                                                                                                                                                                                                                                                                                                    |
| <b>Introduction</b>          |          |                                                                                                                                                                                                                                                                                                                                                                                                                                                                                                                                                                                                                                                                                                  |
| Background/rationale         | 2        | Explain the scientific background and rationale for the investigation being reported                                                                                                                                                                                                                                                                                                                                                                                                                                                                                                                                                                                                             |
| Objectives                   | 3        | State specific objectives, including any prespecified hypotheses                                                                                                                                                                                                                                                                                                                                                                                                                                                                                                                                                                                                                                 |
| <b>Methods</b>               |          |                                                                                                                                                                                                                                                                                                                                                                                                                                                                                                                                                                                                                                                                                                  |
| Study design                 | 4        | Present key elements of study design early in the paper                                                                                                                                                                                                                                                                                                                                                                                                                                                                                                                                                                                                                                          |
| Setting                      | 5        | Describe the setting, locations, and relevant dates, including periods of recruitment, exposure, follow-up, and data collection                                                                                                                                                                                                                                                                                                                                                                                                                                                                                                                                                                  |
| Participants                 | 6        | (a) <i>Cohort study</i> —Give the eligibility criteria, and the sources and methods of selection of participants. Describe methods of follow-up<br><i>Case-control study</i> —Give the eligibility criteria, and the sources and methods of case ascertainment and control selection. Give the rationale for the choice of cases and controls<br><i>Cross-sectional study</i> —Give the eligibility criteria, and the sources and methods of selection of participants<br>(b) <i>Cohort study</i> —For matched studies, give matching criteria and number of exposed and unexposed<br><i>Case-control study</i> —For matched studies, give matching criteria and the number of controls per case |
| Variables                    | 7        | Clearly define all outcomes, exposures, predictors, potential confounders, and effect modifiers. Give diagnostic criteria, if applicable                                                                                                                                                                                                                                                                                                                                                                                                                                                                                                                                                         |
| Data sources/<br>measurement | 8*       | For each variable of interest, give sources of data and details of methods of assessment (measurement). Describe comparability of assessment methods if there is more than one group                                                                                                                                                                                                                                                                                                                                                                                                                                                                                                             |
| Bias                         | 9        | Describe any efforts to address potential sources of bias                                                                                                                                                                                                                                                                                                                                                                                                                                                                                                                                                                                                                                        |
| Study size                   | 10       | Explain how the study size was arrived at                                                                                                                                                                                                                                                                                                                                                                                                                                                                                                                                                                                                                                                        |
| Quantitative variables       | 11       | Explain how quantitative variables were handled in the analyses. If applicable, describe which groupings were chosen and why                                                                                                                                                                                                                                                                                                                                                                                                                                                                                                                                                                     |
| Statistical methods          | 12       | (a) Describe all statistical methods, including those used to control for confounding<br>(b) Describe any methods used to examine subgroups and interactions<br>(c) Explain how missing data were addressed<br>(d) <i>Cohort study</i> —If applicable, explain how loss to follow-up was addressed<br><i>Case-control study</i> —If applicable, explain how matching of cases and controls was addressed<br><i>Cross-sectional study</i> —If applicable, describe analytical methods taking account of sampling strategy<br>(e) Describe any sensitivity analyses                                                                                                                                |

Continued on next page

**Results**

|                  |     |                                                                                                                                                                                                                                                                                                                                                                                                               |
|------------------|-----|---------------------------------------------------------------------------------------------------------------------------------------------------------------------------------------------------------------------------------------------------------------------------------------------------------------------------------------------------------------------------------------------------------------|
| Participants     | 13* | (a) Report numbers of individuals at each stage of study—eg numbers potentially eligible, examined for eligibility, confirmed eligible, included in the study, completing follow-up, and analysed<br>(b) Give reasons for non-participation at each stage<br>(c) Consider use of a flow diagram                                                                                                               |
| Descriptive data | 14* | (a) Give characteristics of study participants (eg demographic, clinical, social) and information on exposures and potential confounders<br>(b) Indicate number of participants with missing data for each variable of interest<br>(c) <i>Cohort study</i> —Summarise follow-up time (eg, average and total amount)                                                                                           |
| Outcome data     | 15* | <i>Cohort study</i> —Report numbers of outcome events or summary measures over time<br><i>Case-control study</i> —Report numbers in each exposure category, or summary measures of exposure<br><i>Cross-sectional study</i> —Report numbers of outcome events or summary measures                                                                                                                             |
| Main results     | 16  | (a) Give unadjusted estimates and, if applicable, confounder-adjusted estimates and their precision (eg, 95% confidence interval). Make clear which confounders were adjusted for and why they were included<br>(b) Report category boundaries when continuous variables were categorized<br>(c) If relevant, consider translating estimates of relative risk into absolute risk for a meaningful time period |
| Other analyses   | 17  | Report other analyses done—eg analyses of subgroups and interactions, and sensitivity analyses                                                                                                                                                                                                                                                                                                                |

**Discussion**

|                  |    |                                                                                                                                                                            |
|------------------|----|----------------------------------------------------------------------------------------------------------------------------------------------------------------------------|
| Key results      | 18 | Summarise key results with reference to study objectives                                                                                                                   |
| Limitations      | 19 | Discuss limitations of the study, taking into account sources of potential bias or imprecision. Discuss both direction and magnitude of any potential bias                 |
| Interpretation   | 20 | Give a cautious overall interpretation of results considering objectives, limitations, multiplicity of analyses, results from similar studies, and other relevant evidence |
| Generalisability | 21 | Discuss the generalisability (external validity) of the study results                                                                                                      |

**Other information**

|         |    |                                                                                                                                                               |
|---------|----|---------------------------------------------------------------------------------------------------------------------------------------------------------------|
| Funding | 22 | Give the source of funding and the role of the funders for the present study and, if applicable, for the original study on which the present article is based |
|---------|----|---------------------------------------------------------------------------------------------------------------------------------------------------------------|

\*Give information separately for cases and controls in case-control studies and, if applicable, for exposed and unexposed groups in cohort and cross-sectional studies.

**Note:** An Explanation and Elaboration article discusses each checklist item and gives methodological background and published examples of transparent reporting. The STROBE checklist is best used in conjunction with this article (freely available on the Web sites of PLoS Medicine at <http://www.plosmedicine.org/>, Annals of Internal Medicine at <http://www.annals.org/>, and Epidemiology at <http://www.epidem.com/>). Information on the STROBE Initiative is available at [www.strobe-statement.org](http://www.strobe-statement.org).

# BMJ Open

## OVERALL, GENDER AND SOCIAL INEQUALITIES IN SUICIDE MORTALITY IN IRAN, 2006-2010: A TIME TREND PROVINCE-LEVEL STUDY

|                                 |                                                                                                                                                                                                                                                                                                                                       |
|---------------------------------|---------------------------------------------------------------------------------------------------------------------------------------------------------------------------------------------------------------------------------------------------------------------------------------------------------------------------------------|
| Journal:                        | <i>BMJ Open</i>                                                                                                                                                                                                                                                                                                                       |
| Manuscript ID:                  | bmjopen-2014-005227.R1                                                                                                                                                                                                                                                                                                                |
| Article Type:                   | Research                                                                                                                                                                                                                                                                                                                              |
| Date Submitted by the Author:   | 21-Jul-2014                                                                                                                                                                                                                                                                                                                           |
| Complete List of Authors:       | Kiadaliri, Aliasghar; Lund University, Health Economics Unit<br>Saadat, Soheil; Tehran University of Medical Sciences, Sina Trauma and Surgery Research Centre<br>Shahnavazi, Hossein; Iranian Forensic Medicine Organization, Medical Records<br>Haghparsast-Bidgoli, Hassan; University College London, Institute for Global Health |
| <b>Primary Subject Heading</b>: | Sociology                                                                                                                                                                                                                                                                                                                             |
| Secondary Subject Heading:      | Epidemiology, Health economics, Health policy, Mental health, Public health                                                                                                                                                                                                                                                           |
| Keywords:                       | Suicide mortality, Social inequality, Pure inequality, Temporal analysis, Iran                                                                                                                                                                                                                                                        |
|                                 |                                                                                                                                                                                                                                                                                                                                       |

SCHOLARONE™  
Manuscripts



1  
2  
3  
4 **OVERALL, GENDER AND SOCIAL INEQUALITIES IN**  
5  
6  
7 **SUICIDE MORTALITY IN IRAN, 2006-2010: A TIME TREND**  
8  
9  
10 **PROVINCE-LEVEL STUDY**  
11

12 Aliasghar A. Kiadaliri

13  
14  
15 Address: Lund University, Department of Clinical Sciences, Malmö; Skane University Hospital;  
16 20502 Malmö, Sweden. Email: aliasghar.ahmad\_kiadaliri@med.lu.se

17  
18  
19 Tel: +46(0)40391425 Fax: +46(0)40391370  
20  
21

22  
23  
24 Aliasghar A. Kiadaliri<sup>1,2</sup>, Soheil Saadat<sup>3</sup>, Hossein Shahnavaizi<sup>4</sup>, Hassan Haghparast-Bidgoli<sup>5</sup>

- 25  
26 1. Health Economics Unit, Department of Clinical Sciences, Lund University, Lund, Sweden  
27  
28 2. Research Centre for Health Services Management, Institute for Futures Studies in Health, Kerman  
29 University of Medical Sciences, Kerman, Iran  
30  
31 3. Sina Trauma and Surgery Research Centre, Tehran University of Medical Sciences, Tehran, Iran  
32  
33 4. Medical Records Department, Iranian Forensic Medicine Organization, Tehran, Iran  
34  
35 5. Institute for Global Health, University College London, London, UK  
36  
37

38 **Running Title:** Inequalities in suicide mortality in Iran

39  
40  
41 *Key words:* Suicide mortality, Social inequality, Overall inequality, Temporal analysis, Iran.  
42

43 Word Count: 3125  
44  
45  
46  
47  
48  
49  
50  
51  
52  
53  
54  
55  
56  
57  
58  
59  
60

## Abstract

**Objectives:** Suicide is a major global health problem imposing a considerable burden on population in terms of disability-adjusted life years. There has been an increasing trend in fatal and attempted suicide in Iran over the past few decades. The aim of the current study was to assess overall, gender and social inequalities across Iran's provinces during 2006-2010.

**Design:** Ecological study.

**Setting:** The data on distribution of population at the provinces were obtained from the Statistical Centre of Iran. The data on the annual number of death caused by suicide in each province were gathered from the Iranian Forensic Medicine Organization.

**Methods:** Suicide mortality rate per 100,000 population was calculated. Human Development Index was used as the provinces' social rank. Gini coefficient, rate ratio and Kunst and Mackenbach relative index of inequality ( $RII_{KM}$ ) were used to assess overall, gender and social inequalities, respectively. Annual percentage change was calculated using Joinpoint regression.

**Results:** Suicide mortality has slightly increased in Iran during 2006-2010. There was a substantial and constant overall inequality across the country over the study period. Male to female rate ratio was 2.34 (95% CI 1.45-3.79) over the same period. There were social inequalities in suicide mortality in favor of people in better-off provinces. In addition, there was an increasing trend in these social disparities over time, although it was not statistically significant.

**Conclusion:** We found substantial overall, gender and social disparities in the distribution of suicide mortality across the provinces in Iran. The findings showed that men in the provinces with low socio-economic status are at higher risk of suicide mortality. Further analyses are needed to explain these disparities.

## Article Summary

### *Strength and limitations of this study*

- This is the first national study to evaluate regional social inequalities in suicide mortality over five-year period.
- Social inequality in suicide mortality was evaluated using Cuzick's test for trend and two common inequality measures: rate ratio (RR) and Kunst and Mackenbach relative index of inequality ( $RII_{KM}$ )
- Age and gender differences between the provinces were naïvely adjusted which might have not fully captured differences in age distribution across provinces.

## Introduction

Suicide is considered as one of the three leading causes of death among 15 to 44 years age group and the second cause of death in 15-19 years age group <sup>1</sup>. It imposes a considerable burden on population in terms of disability-adjusted life year (DALY) and it has been projected that suicide will compose about 2.4% of global burden of diseases by 2020 <sup>2</sup>.

Similar to other developing countries, Iran has been experienced a rapid increase in suicide rate during recent years. A recent study showed that suicide and attempted suicide in Iran have increased from 8.3 per 100,000 population in 2001 to 16.3 in 2007 <sup>3</sup>. Moreover, suicide account for 4% of the injury cases admitted to the general hospitals in the country <sup>4</sup>.

The risk factors of suicide are consisted of some demographical characteristics <sup>5</sup>, socio-economic situations <sup>6</sup> and medical conditions <sup>7</sup>. However, there are factors related to the area of residence that influence the suicide rate <sup>8</sup>. Evidence demonstrates persistent geographical disparities in distribution of suicide between and within countries which support area-level correlates of suicide <sup>9</sup>.

Iran is a Middle Eastern country with 1,628,550 square kilometer land area <sup>10</sup> and is consisted of 31 provinces <sup>11</sup> that are in different levels of development. Ethnic groups tend to reside in neighboring provinces. Therefore, there are variations in socioeconomic level and ethnicity across provinces as well as geographical and ecological differences that could cause a disparity among suicide mortality rate.

While information on the individual risk factors and outcomes of suicide attempts have been well documented in previous studies in Iran <sup>3, 4, 12-15</sup>, there is little information on the role of socio-economic factors and suicide incidence. In particular, there is no known study evaluating regional socio-economic disparities and their impact on suicide rate in Iran.

To fill the gap, this study aimed to describe overall and social inequality in suicide mortality rates across all the provinces in Iran from 2006 to 2010. Though this is an ecological study, it will provide a useful starting point for examining the social disparity of suicide and provide valuable information for policy makers in order to prioritize prevention strategies.

## METHODS

1  
2  
3 The data on distribution of population at the provinces were obtained from the Statistical  
4 Centre of Iran. It should be noted that at the time of conducting the current study, Iran  
5 constituted of 30 provinces and it was later when Tehran province was split into two  
6 provinces. The data on the annual number of death caused by suicide in each province were  
7 gathered from the published reports <sup>16</sup> of Iranian Forensic Medicine Organization which is  
8 affiliated to the Judicial Authority in Iran. According to the Iranian law, all deaths due to  
9 external causes should be reported to this organization for examination and recording and to  
10 issue the death certificate. It is considered as the most reliable source of mortality data in Iran  
11 <sup>17</sup>. Then, annual suicide mortality rates per 100,000 population were calculated for each  
12 province. Human Development Index (HDI) was used as the provinces' social rank and  
13 related data were obtained from the President Deputy of Strategic Planning and Control. The  
14 HDI is a composite index of three basic dimensions of human development, including life  
15 expectancy at birth, educational attainment (based on a combination of adult literacy rate and  
16 primary education to tertiary education enrolment rates), and income (based on GDP per head  
17 adjusted for purchasing-power parity [US\$]) <sup>18</sup>. As a composite index, it is expected that HDI  
18 might capture socioeconomic development more comprehensively than single indicators such  
19 as average income or expenditures.  
20  
21

22  
23  
24  
25  
26  
27  
28  
29  
30  
31  
32 Overall inequality measures inequalities in health irrespective of the other characteristics of  
33 the individuals <sup>19</sup>. To measure overall inequality we followed the same approach as  
34 measuring income inequality and used Lorenz curve and Gini coefficient. These two  
35 measures are commonly used in assessing overall inequality in distribution of health care  
36 resources and outcomes <sup>20-22</sup>. Lorenz curve is used to compare distribution of health measure  
37 with perfect equality (diagonal line). In the current study, Lorenz curve was plotted as the  
38 cumulative share of population ranked by suicide mortality rate, in an increasing order,  
39 against the cumulative share of suicide mortality. The further the distance from diagonal line  
40 implies the greater degree of inequality. The Gini coefficient is equal to twice the area  
41 between the Lorenz curve and diagonal and its value ranges from 0 (perfect equality) to one  
42 (maximum possible inequality). This measure takes into account the distribution of health  
43 variable across the entire population. In the current study, we used *fastgini* command in  
44 STATA to calculate Gini coefficient and its jackknife 95% confidence interval. In order to  
45 examine gendered nature of suicide mortalities (i.e. gender inequality) in Iran, we calculated  
46 the male to female rate ratio and its 95% confidence interval using negative binomial  
47  
48  
49  
50  
51  
52  
53  
54  
55  
56  
57  
58  
59  
60

1  
2  
3 regression with a robust variance. As we had only data stratified by sex groups for the whole  
4 study period and not for every specific year, an overall rate ratio was calculated.  
5  
6

7 Social inequality was evaluated using Cuzick's test for trend and two common inequality  
8 measures: rate ratio (RR) and Kunst and Mackenbach relative index of inequality ( $RII_{KM}$ )<sup>23</sup>.  
9 Cuzick's test for trend is an extension of the Wilcoxon rank-sum test and is used as a non-  
10 parametric test for trend across ordered groups<sup>24</sup>. To calculate RR, the provinces were ranked  
11 and divided in five quintiles by HDI (weighted by their population). Then, negative binomial  
12 regression with a robust variance was used to calculate RR and its 95% confidence interval to  
13 compare the highest versus the lowest quintile. One problem with RR is that it only considers  
14 the population in two extreme socioeconomic groups. To take into account the whole  
15 population distribution across socioeconomic groups and also to remove differences in the  
16 size of socioeconomic groups, as a source of variation in the magnitude of health inequalities,  
17  $RII_{KM}$  was calculated<sup>23</sup>. RII is widely used to measure social inequality and is recommended  
18 when making comparisons over time or across populations<sup>25</sup>. To calculate RII, after  
19 determine the relative position of the population in the provinces ranked by HDI, the number  
20 of deaths in the provinces was regressed on these relative ranks using negative binomial  
21 regression with a robust variance and population as offset variable. With the lowest social  
22 rank as reference, an  $RII_{KM}$  value greater (lesser) than 1 show that suicide mortality rate was  
23 higher among the provinces with higher (lower) social rank (more distance from 1 implies  
24 more inequality)<sup>21</sup>. To account for sex and age differences between the provinces, we also  
25 estimated adjusted  $RII_{KM}$  by including proportion of male in population, mean age of females  
26 and mean age of males in our negative binomial regression.  
27  
28  
29  
30  
31  
32  
33  
34  
35  
36  
37  
38  
39  
40

41 To examine temporal changes of suicide mortality rate across the provinces and also across  
42 the quintiles of HDI, we calculated annual percentage change (APC) and its 95% confidence  
43 interval for each province and quintile using the Joinpoint Regression Program 3.5.4.  
44 Moreover, this program was used to calculate APC of overall and socioeconomic inequality  
45 measures over study period. APC is estimated using following regression:  
46  
47  
48  
49

$$\text{Ln}(I_t) = b_0 + b_1(t)$$

$$APC = (e^{b_1} - 1) \times 100$$

50  
51  
52  
53  
54  
55 Where  $I_t$  shows the suicide mortality rate and estimated inequality indices for year  $t$ .  
56  
57  
58  
59  
60

1  
2  
3 In a sensitivity analysis, Tehran was excluded from the analysis to examine the overall,  
4 gender and social inequalities across the remaining provinces. The reason for this was that  
5 Tehran has special situation as the capital of the country and being the centre of economic,  
6 social and political activities. Excel office and STATA version 11 (StataCorp LP, College  
7 Station, TX, USA) were used for statistical analysis.  
8  
9  
10

## 11 12 13 14 15 **Results**

16  
17 Table 1 shows mean population, HDI, suicide mortality rate and APC (%) across the  
18 provinces for years 2006-2010. Ilam and Hormozgan provinces had the highest and the  
19 lowest suicide mortality rate during the study period, respectively (8.8-fold difference). Most  
20 provinces (56.6%) had a suicide mortality rate of 3 to 6 per 100,000 population. In addition,  
21 suicide mortality rate was more prevalent among the western provinces of Iran (Figure 1).  
22  
23  
24

25  
26 The estimated APC values show that only five provinces experienced significant changes in  
27 suicide mortality rate over the study period (significant increases in Ilam, Isfahan, North  
28 Khorasan and Tehran provinces and significant decrease in Markazi province).  
29  
30  
31

32 Figure 2a shows temporal changes of suicide mortality rate for the country. While the graph  
33 shows a slight increase in suicide mortality rate over the study period (from 4.25 in 2006 to  
34 4.88 in 2010), this was not statistically significant (APC=3.05%, P=0.23). Figure 2b presents  
35 suicide mortality rates for five quintiles of HDI and examining the trends showed that APC  
36 was significant only in the highest quintile (APC=17.98, P=0.01). Figure 3 shows scatter  
37 graphs of HDI and suicide mortality rates. It is evident that the higher HDI was associated  
38 with the lower suicide mortality rate and Cuzick's test confirmed this (Z=-4.61, P<0.011).  
39  
40  
41  
42  
43

44 Male to female rate ratio was 2.34 (95% CI 1.45-3.79) implying a significant higher suicide  
45 mortality rate among males than females over the study period. Examining this ratio in the  
46 provinces showed that in all provinces but Kordestan men had a higher suicide mortality rate  
47 than women. Excluding Tehran from the sample did not change this finding (2.33; 95% CI  
48 1.43-3.79).  
49  
50  
51  
52

53 Table 2 presents the overall and social inequality measures in distribution of suicide mortality  
54 rate across the country through 2006-2010. The Gini coefficient ranged from 0.248 to 0.302  
55 implying substantial overall inequality across the provinces. The Lorenz curves corresponded  
56  
57  
58  
59  
60

1  
2  
3 to this Gini coefficient is been shown in Figure 4. There was a 14.5% decrease in Gini  
4 coefficient between the first year and the last year of study implying decreasing overall  
5 inequality between these two points of time. Over the study period, the APC of Gini  
6 coefficient was -4.28 and statistically non-significant. Excluding Tehran resulted in a 6.9%  
7 increase in Gini coefficient between the first and the last year of the study period and a  
8 statistically non-significant APC of 1.42 was estimated.  
9  
10

11  
12  
13 RR was significantly lower than 1 in overall and for all years of the study period, implying a  
14 higher suicide mortality rate among people in the lowest quintile of HDI compared with the  
15 highest one. Over the study period, RR was approaching 1 and the APC of RR was 12.20 and  
16 statistically significant implying a decrease in the gap between the highest and the lowest  
17 social ranks. Although excluding Tehran from the sample did not change the overall picture  
18 of social inequality, an inverse trend (increasing social inequality) was observed.  
19  
20  
21

22  
23  
24  $RII_{KM}$  was also lower than 1 in overall and for all years of the study, showing a persistent  
25 inequality in favor of people living in the provinces with higher social rank. Temporal  
26 analysis showed that  $RII_{KM}$  did not significantly change over the study period. Adjusting for  
27 age and sex this observation. When we excluded the Tehran province, the APC value for  
28 adjusted  $RII_{KM}$  was statistically significant showing an increase in social disparity across the  
29 remaining provinces in Iran.  
30  
31  
32  
33  
34

### 35 Discussion

36  
37  
38 In this study, for the first time, we assessed overall and social disparities in the distribution of  
39 suicide mortality across the provinces of Iran over a period of five years (2006-2010). The  
40 findings showed that suicide mortality has slightly increased over the study period. The  
41 findings also indicated that there were substantial overall, gender and social disparities in the  
42 distribution of suicide mortality across the country, and it was higher in the provinces with  
43 lower social rank. These disparities were generally stable and persistent over the study  
44 period.  
45  
46  
47  
48

49  
50 The findings from the current study showed an inverse association between the provinces'  
51 social rank and suicide mortality in Iran. Although the studies on association between area  
52 social rank and suicide mortality reported mixed results<sup>9, 26</sup>, the results of this study is in line  
53 with previous ecological studies investigating the relationship between socioeconomic  
54 characteristics and suicide rate, in particular the studies focused on high income settings<sup>9, 27-</sup>  
55  
56  
57  
58  
59  
60



1  
2  
3 33. Rehkopf and Buka<sup>9</sup> in their systematic review of suicide and socioeconomic  
4 characteristics of geographical areas found that, among studies with statistically significant  
5 results, 50% and 73% of studies reported an inverse relation between area income and  
6 education characteristics and completed suicide, respectively. They also found that the  
7 probability of reporting an inverse relationship between area social rank and suicide mortality  
8 was higher among the studies conducted in Asia (94% of studies with statistically significant  
9 results)<sup>9</sup>. Similar finding was reported by another study<sup>34</sup> focusing on the countries in  
10 Eastern Mediterranean region (where Iran is located), indicating that high income countries  
11 had lower suicide mortality rate than their low and middle income counterparts. It is argued  
12 that people in the provinces with lower social rank generally have more adverse experiences,  
13 poorer mental health, lower access to psychiatric services, and lower access to health  
14 facilities. These factors might partly explain higher suicide mortality rate in the provinces  
15 with lower social rank in Iran.  
16  
17  
18  
19  
20  
21  
22  
23  
24

25 The four Western provinces of Iran (i.e., Ilam, Kermanshah, Lorestan and Hamedan) had the  
26 highest suicide mortality rate in the country. One potential explanation for this observation  
27 can be low socioeconomic status of these provinces. These provinces are among the  
28 provinces with the highest unemployment rate and the lowest HDI in the country. High  
29 divorce rates in these provinces (except for Ilam) can be another potential explanation as  
30 divorce is considered as a risk factor for suicide mortality<sup>35, 36</sup>. In addition, cultural issues  
31 such as the tribal structure of communities and the extreme fanaticism prevailing in these  
32 provinces have been considered as another potential explanation for this finding<sup>37</sup>.  
33  
34  
35  
36  
37  
38  
39

40 The high gender gap in suicide mortality rate observed in the current study is in line with the  
41 previous epidemiological studies in Iran<sup>3, 4, 14</sup> and is comparable to the studies conducted in  
42 other settings, in particular high income countries<sup>6, 9, 38, 39</sup>. Although many studies, including  
43 the previous studies in Iran<sup>3, 4, 14</sup>, have shown higher suicide attempt rate among females,  
44 completed (fatal) suicides are higher among males. One potential explanation can be the  
45 difference in methods of attempting suicide among males and females. For example, the most  
46 common methods of attempting suicide used by males in Iran are hanging and firearms which  
47 have higher fatality rate compared with self-burning method commonly used by females<sup>3, 14,</sup>  
48 <sup>39, 40</sup>. Greater psychosocial impact of problems, such as unemployment or retirement, on  
49 males compared to female<sup>39, 41, 42</sup> and adopting coping strategies such as emotional  
50 inexpressiveness, lack of help-seeking, risk-taking behaviour, violence, alcohol and drug  
51 abuse by males (which are triggered by norms of traditional masculinity)<sup>43, 44</sup> are other  
52  
53  
54  
55  
56  
57  
58  
59  
60

1  
2  
3 potential factors which have been discussed in the literature. The findings of the gender  
4 analysis are important for designing and implementing suicide prevention strategies as the  
5 factors, patterns, and behaviours associated with suicide are affected by gender.  
6  
7  
8  
9

10  
11 Temporal analysis of suicide mortality showed interesting results indicating that among five  
12 quintiles of HDI, it was only the highest quintile that experienced a significant change in  
13 suicide mortality over the study period. This finding potentially can be explained by  
14 increasing prevalence of mental disorders, raising unemployment rate<sup>13, 45</sup> and increasing  
15 trend in divorce rate<sup>13</sup> in the provinces with higher HDI, such as Tehran, the capital city of  
16 Iran.  
17  
18  
19

20  
21 To our knowledge, this is the first national study evaluating social inequalities across  
22 different regions over time. Although this study conducted in the context of Iran, however,  
23 the findings may also be applicable to other middle-income countries, in particular countries  
24 in the Middle East region, which share similar culture. Moreover, we believe that, in terms of  
25 methodology, our analysis present a good example for employing a triangulation of different  
26 methods for evaluating inequalities in suicide mortalities. However, the current study has  
27 several limitations that should be considered when interpreting its findings. Firstly, age and  
28 gender differences between the provinces were naïvely adjusted which might have not fully  
29 captured differences in age distribution across provinces. Secondly, there is the issue of  
30 availability and quality of data on suicide which is common in developing countries settings  
31<sup>26, 46</sup> and leads to underestimation and misclassification of suicide. This might be an issue in  
32 this study because of the social stigma of suicide and religious sanctions and some legal  
33 issues in the Iranian context<sup>34, 4</sup>. Moreover, the underestimation and misclassification of  
34 suicide mortality might be more common in the provinces with lower social rank; therefore,  
35 we expect that the social disparity to be more profound than what has been reported here.  
36 Thirdly, the current study is an ecological study using province as unit of analysis which  
37 embraces substantial heterogeneity within provinces. This implies that the observed  
38 disparities in suicide mortality are between-provinces and it is not necessarily applicable to  
39 smaller geographic units or individuals. Furthermore, no causal inference can be drawn due  
40 to ecological nature of the study and that there was no control for confounders in this study.  
41  
42  
43  
44  
45  
46  
47  
48  
49  
50  
51  
52  
53  
54

## 55 **Conclusion**

56  
57  
58  
59  
60

1  
2  
3 The present study indicated that there were substantial overall, gender and social disparities  
4 in the distribution of suicide mortalities across the provinces in Iran. Moreover, the study  
5 showed an inverse association between the provinces' social rank and suicide mortality. The  
6 findings imply that prevention resources should be targeted high risk groups, in particular  
7 men in the provinces with low socio-economic status. Further investigations are needed to  
8 explain these disparities in suicide mortality across the provinces. Moreover, more studies  
9 needed to explore the association of socio-economic factors and suicide (attempt and fatal)  
10 focusing on the smaller geographical units and at the individual level in order to design better  
11 prevention strategies.  
12  
13  
14  
15  
16  
17  
18

### 19 **List of Abbreviations**

20  
21 DALY: Disability-adjusted Life Years, HDI: Human Development Index, RR: rate ratio,  
22 RII<sub>KM</sub>: Kunst and Mackenbach relative index of inequality, APC: annual percentage change  
23  
24  
25  
26  
27  
28  
29  
30  
31  
32  
33  
34  
35  
36  
37  
38  
39  
40  
41  
42  
43  
44  
45  
46  
47  
48  
49  
50  
51  
52  
53  
54  
55  
56  
57  
58  
59  
60

**Funding**

No funding has been received for the conduct of this study and/or preparation of this manuscript.

**Authors' contributions**

AAK was involved in the study conception and design, data collection and analysis, interpretation of the data, and writing the manuscript. HHB and SS were involved in the study design, results interpretation, and writing the manuscript. HS was involved in the study design, data collection and finalization of the manuscript. All authors read and approved the final manuscript.

**Competing interests**

The authors declare that they have no competing interests. No funding has been received for the conduct of this study and/or preparation of this manuscript.

**Data Sharing Statement**

No additional data available

## References

1. Patton GC, Coffey C, Sawyer SM, et al. Global patterns of mortality in young people: a systematic analysis of population health data. *Lancet* 2009, 374:881-892.
2. Bertolote JM, Fleischmann A: A Global Perspective On the Magnitude of Suicide Mortality. In *Oxford Textbook of Suicidology and Suicide Prevention: a global perspective*. Oxford University Press; 2009: 91-98
3. Saberi-Zafaghani MB, Hajebi A, Eskandarieh S, et al. Epidemiology of suicide and attempted suicide derived from the health system database in the Islamic Republic of Iran: 2001-2007. *East Mediterr Health J* 2012, 18:836-841.
4. Sharif-Alhoseini M, Rasouli MR, Saadat S, et al. Suicide attempts and suicide in Iran: results of national hospital surveillance data. *Public Health* 2012.992-126:990 ,
5. WHO (2012). *Public health action for the prevention of suicide: a framework*. World Health Organization, Geneva.
6. Pompili M, Innamorati M, Vichi M, et al. Inequalities and impact of socioeconomic-cultural factors in suicide rates across Italy. *Crisis* 2011, 32:178-185.
7. Ikeda RM, Kresnow MJ, Mercy JA, et al. Medical conditions and nearly lethal suicide attempts. *Suicide Life Threat Behav* 2001, 32:60-67.
8. Hirsch JK: A review of the literature on rural suicide: risk and protective factors, incidence, and prevention. *Crisis* 2006, 27:189-199.
9. Rehkopf DH, Buka SL: The association between suicide and the socio-economic characteristics of geographical areas: a systematic review. *Psychol Med* 2006, 36:145-157.
10. World Bank (2013). Islamic Republic of Iran. <http://data.worldbank.org/country/iran-islamic-republic>. Accessed 15.09.2013.
11. Statistical Center of Iran (2013). Iran at a glance. <http://www.amar.org.ir/Default.aspx?tabid=1321>. Accessed 15.09.2013
12. Farzaneh E, Mehrpour O, Alfred S, et al. Self-poisoning suicide attempts among students in Tehran, Iran. *Psychiatr Danub* 2010, 22:34-38.
13. Nazarzadeh M, Bidel Z, Ayubi E, et al. Determination of the social related factors of suicide in Iran: a systematic review and meta-analysis. *BMC Public Health* 2013, 13:4.
14. Shirazi HR, Hosseini M, Zoladl M, et al. Suicide in the Islamic Republic of Iran: an integrated analysis from 1981 to 2007. *East Mediterr Health* 2012, 18:607-613.
15. Taghaddosinejad F, Sheikhzadi A, Behnoush B, et al. A survey of suicide by burning in Tehran, Iran. *Acta Med Iran* 2010, 4.272-8:266
16. Khademi A, Moradi S: *Statistical Investigation of Unnatural Deaths in Iran (2001-2010)*. Forensic Medicine Organization, Tehran,Iran.
17. Montazeri A :Road-traffic-related mortality in Iran: a descriptive study. *Public Health* 2004, 118:110-113.
18. United Nations Development Program: Human Development Index (HDI). <http://hdr.undp.org/en/statistics/hdi/> accessed 01December 2013.
19. Wagstaff A, van Doorslaer E: Overall versus socioeconomic health inequality: a measurement framework and two empirical illustrations. *Health Econ* 2004, 13(3):297-301.
20. Ahmad Kiadaliri A, Najafi B, et al. Geographic distribution of need and access to health care in rural population: an ecological study in Iran. *Int J Equity Health* 2011, 10:39.

- 1
- 2
- 3 21. Kiadaliri AA, Hosseinpour R, Haghparast-Bidgoli H, et al. Pure and social disparities in
- 4 distribution of dentists: a cross-sectional province-based study in Iran. *Int J Environ*
- 5 *Res Public Health* 2013, 10:1882-1894.
- 6
- 7 22. Shen J, Wildman J, Steele J: Measuring and decomposing oral health inequalities in
- 8 an UK population. *Community Dent Oral Epidemiol* 2013, 41:481-489.
- 9
- 10 23. Mackenbach JP, Kunst AE: Measuring the magnitude of socio-economic inequalities
- 11 in health: an overview of available measures illustrated with two examples from
- 12 Europe. *Soc Sci Med* 1997, 44:757-771.
- 13
- 14 24. Cuzick J: A Wilcoxon-type test for trend. *Stat Med* 1985, 4:87-90.
- 15 25. Cavelaars AE, Kunst AE, Geurts JJ, et al. Educational differences in smoking:
- 16 international comparison. *BMJ* 2000, 320:1102-1107.
- 17 26. Bando DH, Brunoni AR, Bensenor IM, et al. Suicide rates and income in Sao Paulo
- 18 and Brazil: a temporal and spatial epidemiologic analysis from 1996 to 2008. *BMC*
- 19 *Psychiatry* 2012, 12:127.
- 20 27. Chang SS, Sterne JA, Wheeler BW et al. Geography of suicide in Taiwan: spatial
- 21 patterning and socioeconomic correlates. *Health Place* 2011, 17:641-650.
- 22 28. Fukuda Y, Nakamura K, Takano T: Cause-specific mortality differences across
- 23 socioeconomic position of municipalities in Japan, 1973-1977 and 1993-1998:
- 24 increased importance of injury and suicide in inequality for ages under 75. *Int J*
- 25 *Epidemiol* 2005, 34:100-109.
- 26 29. Martiello MA, Giacchi MV: Ecological study of isolation and suicide in Tuscany (Italy).
- 27 *Psychiatry Res* 2012, 198:68-73.
- 28
- 29 30. Rezaeian M, Dunn G, St Leger S, et al. Ecological association between suicide rates
- 30 and indices of deprivation in the north west region of England: the importance of the
- 31 size of the administrative unit. *J Epidemiol Community Health* 2006, 60:956-961.
- 32 31. Taylor R, Page A, Morrell S, et al. Mental health and socio-economic variations in
- 33 Australian suicide. *Soc Sci Med* 2005, 61:1551-1559.
- 34 32. Tondo L, Albert MJ, Baldessarini RJ: Suicide rates in relation to health care access in
- 35 the United States :an ecological study. *J Clin Psychiatry* 2006, 67:517-523.
- 36 33. Ying YH, Chang K: A study of suicide and socioeconomic factors. *Suicide Life Threat*
- 37 *Behav* 2009, 39:214-226.
- 38 34. Rezaeian M: Age and sex suicide rates in the Eastern Mediterranean Region based on
- 39 global burden of disease estimates for 2000. *East Mediterr Health J* 2007, 13:953-
- 40 960.
- 41 35. Kposowa AJ: Marital status and suicide in the National Longitudinal Mortality Study. *J*
- 42 *Epidemiol Community Health* 2000,54(4):254-61.
- 43 36. Corcoran P, Nagar A: Suicide and marital status in Northern Ireland. *Soc Psychiatry*
- 44 *Psychiatr Epidemiol* 2010,45(8):795-800.
- 45 37. Aliverdina A, Pridemore WA: Women's fatalistic suicide in Iran: a partial test of
- 46 Durkheim in an Islamic Republic. *Violence Against Women* 2009, 15:307-320.
- 47 38. Cleary A: Suicidal action, emotional expression, and the performance of
- 48 masculinities. *Soc Sci Med* 2012, 74:498-505.
- 49 39. Cheong KS, Choi MH, Cho BM, et al. Suicide rate differences by sex, age, and
- 50 urbanicity, and related regional factors in Korea. *J Prev Med Public Health* 2012,
- 51 45:70-77.
- 52
- 53
- 54
- 55
- 56
- 57
- 58
- 59
- 60

- 1
- 2
- 3 40. Shojaei A, Moradi S, Alaeddini F, et al. Association between suicide method, and
- 4 gender, age, and education level in Iran over 2006-2010. *Asia Pac Psychiatry*
- 5 2014,6(1):18-22.
- 6
- 7 41. Qin P, Agerbo E, Mortensen PB: Suicide risk in relation to socioeconomic,
- 8 demographic, psychiatric, and familial factors: A national register-based study of all
- 9 suicides in Denmark, 1981-1997. *Am J Psychiat* 2003, 160:765-772.
- 10
- 11 42. Qin P, Agerbo E, Westergard-Nielsen N, et al. Gender differences in risk factors for
- 12 suicide in Denmark. *Br J Psychiatry* 2000, 177:546-50.
- 13
- 14 43. Hawton K: Sex and suicide - Gender differences in suicidal behaviour. *Brit J Psychiat*
- 15 2000, 177:484-485.
- 16
- 17 44. Moller-Leimkuhler AM: The gender gap in suicide and premature death or: why are
- 18 men so vulnerable? *Eur Arch Psychiatry Clin Neurosci* 2003, 253:1-8.
- 19
- 20 45. Sheikholeslami H, Kani C, Ziaee A: Attempted suicide among Iranian population.
- 21 *Suicide Life Threat Behav* 2008, 38:456-466.
- 22
- 23 46. Vijayakumar L, Nagaraj K, Pirkis J, et al. Suicide in developing countries :(1)
- 24 frequency, distribution, and association with socioeconomic indicators. *Crisis* 2005,
- 25 26:104-111.
- 26
- 27
- 28
- 29
- 30
- 31
- 32
- 33
- 34
- 35
- 36
- 37
- 38
- 39
- 40
- 41
- 42
- 43
- 44
- 45
- 46
- 47
- 48
- 49
- 50
- 51
- 52
- 53
- 54
- 55
- 56
- 57
- 58
- 59
- 60

Table 1. Mean population, human development index (HDI), suicide mortality rate and annual percentage change across the provinces in Iran, 2006-2010 (Ranked by Suicide mortality rate).

|                          | Population | HDI   | Suicide mortality rate per 100,000 population | APC (%)*      |
|--------------------------|------------|-------|-----------------------------------------------|---------------|
| Ilam                     | 555,929    | 0.729 | 19.53                                         | <b>10.11</b>  |
| Kermanshah               | 1,892,100  | 0.748 | 13.74                                         | 0.46          |
| Lorestan                 | 1,736,946  | 0.761 | 10.64                                         | 1.18          |
| Hamedan                  | 1,700,960  | 0.740 | 9.59                                          | -1.52         |
| Gilan                    | 2,428,553  | 0.769 | 6.52                                          | 9.98          |
| Ardebil                  | 1,235,234  | 0.735 | 6.22                                          | -2.32         |
| East Azerbaijan          | 3,646,459  | 0.763 | 5.58                                          | 1.31          |
| Zanjan                   | 973,739    | 0.752 | 5.53                                          | 12.14         |
| Kohgiluyeh & Boyer-Ahmad | 651,577    | 0.718 | 5.25                                          | -4.20         |
| Khuzestan                | 4,372,242  | 0.762 | 5.11                                          | -7.13         |
| West Azerbaijan          | 2,944,224  | 0.713 | 4.72                                          | -2.74         |
| Kordestan                | 1,453,503  | 0.713 | 4.69                                          | 5.25          |
| Golestan                 | 1,651,708  | 0.737 | 4.49                                          | 5.67          |
| Overall (Iran)           | 72,599,045 | 0.758 | 4.46                                          | 3.05          |
| Qazvin                   | 1,177,582  | 0.783 | 4.25                                          | -1.13         |
| North Khorasan           | 824,979    | 0.759 | 4.24                                          | <b>10.64</b>  |
| Fars                     | 4,431,684  | 0.783 | 4.16                                          | 1.56          |
| Chaharmahal Bakhtiari    | 875,207    | 0.749 | 4.00                                          | -7.72         |
| Qom                      | 1,087,011  | 0.773 | 3.75                                          | 7.89          |
| Mazandaran               | 2,979,189  | 0.745 | 3.66                                          | -5.71         |
| Isfahan                  | 4,680,831  | 0.810 | 3.64                                          | <b>4.62</b>   |
| Kerman                   | 2,799,417  | 0.750 | 3.10                                          | -5.03         |
| Bushehr                  | 914,710    | 0.786 | 3.02                                          | 15.55         |
| South Khorasan           | 656,469    | 0.723 | 3.02                                          | -2.28         |
| Tehran                   | 14,106,297 | 0.843 | 2.92                                          | <b>17.98</b>  |
| Yazd                     | 1,028,152  | 0.809 | 2.68                                          | -4.48         |
| Razavi Khorasan          | 5,765,706  | 0.777 | 2.66                                          | -2.64         |
| Semnan                   | 606,982    | 0.814 | 2.60                                          | 4.27          |
| Markazi                  | 1,371,514  | 0.785 | 2.38                                          | <b>-10.73</b> |
| Sistan & Baluchestan     | 2,569,107  | 0.643 | 2.23                                          | 6.11          |
| Hormozgan                | 1,481,031  | 0.766 | 2.21                                          | -5.59         |

\*Bold figures show statistically significant results (p<0.05)



1  
2  
3  
4  
5  
6  
7  
8  
9  
10  
11  
12  
13  
14  
15  
16  
17  
18  
19  
20  
21  
22  
23  
24  
25  
26  
27  
28  
29  
30  
31  
32  
33  
34  
35  
36  
37  
38  
39  
40  
41  
42  
43  
44  
45  
46  
47  
48  
49

Table 2. Overall and social inequality measures of suicide mortality in Iran, 2006-2010.

|                                | Total sample (n=30) |                     |                     |                     |                     | Overall             | APC (Pvalue)   |
|--------------------------------|---------------------|---------------------|---------------------|---------------------|---------------------|---------------------|----------------|
|                                | 2006                | 2007                | 2008                | 2009                | 2010                |                     |                |
| Gini index                     | 0.290 (0.193-0.386) | 0.302 (0.212-0.392) | 0.271 (0.182-0.361) | 0.268 (0.165-0.371) | 0.248 (0.151-0.345) | 0.281 (0.240-0.322) | -4.28 (0.050)  |
| Rate ratio*                    | 0.359 (0.256-0.503) | 0.325 (0.225-0.469) | 0.428 (0.284-0.646) | 0.496 (0.296-0.830) | 0.535 (0.316-0.906) | 0.426 (0.275-0.659) | 12.20 (0.049)  |
| RII <sub>KM</sub>              | 0.345 (0.174-0.686) | 0.257 (0.127-0.521) | 0.289 (0.142-0.588) | 0.337 (0.147-0.776) | 0.341 (0.148-0.784) | 0.339 (0.166-0.671) | 1.75 (0.745)   |
| Adjusted RII <sub>KM</sub> **  | 0.279 (0.129-0.600) | 0.205 (0.098-0.431) | 0.224 (0.102-0.489) | 0.133 (0.039-0.455) | 0.160 (0.051-0.507) | 0.171 (0.054-0.548) | -13.75 (0.073) |
| Sample excluding Tehran (n=29) |                     |                     |                     |                     |                     |                     |                |
| Gini index                     | 0.259 (0.168-0.350) | 0.285 (0.187-0.382) | 0.282 (0.187-0.378) | 0.292 (0.192-0.392) | 0.277 (0.191-0.363) | 0.282 (0.243-0.322) | 1.42 (0.38)    |
| Rate ratio*                    | 0.646 (0.444-0.938) | 0.397 (0.226-0.695) | 0.415 (0.247-0.696) | 0.520 (0.277-0.974) | 0.492 (0.262-0.924) | 0.584 (0.380-0.896) | -6.59 (0.403)  |
| RII <sub>KM</sub>              | 0.460 (0.257-0.823) | 0.339 (0.179-0.644) | 0.352 (0.185-0.672) | 0.397 (0.187-0.839) | 0.389 (0.185-0.819) | 0.411 (0.215-0.785) | -2.76 (0.575)  |
| Adjusted RII <sub>KM</sub> **  | 0.402 (0.224-0.722) | 0.301 (0.168-0.541) | 0.310 (0.165-0.580) | 0.211 (0.077-0.577) | 0.241 (0.093-0.623) | 0.241 (0.090-0.649) | -12.95 (0.045) |

\*The highest vs. the lowest quintile of HDI  
 \*\*Adjusted for proportion of males and mean age of males and females in the provinces.

1  
2  
3 **Figure 1.** Distribution of suicide mortality rate across the provinces in Iran.  
4

5 **Figure 2.** Suicide mortality rates per 100,000 populations in a) total sample; b) quintiles of  
6 HDI, 2006-2010.  
7

8  
9 **Figure 3.** Scatter plots of HDI and suicide mortality rates, stratified by year of study.  
10

11 **Figure 4.** Lorenz curves of the distribution of suicide mortality in Iran, 2006-2010.  
12  
13  
14  
15  
16  
17  
18  
19  
20  
21  
22  
23  
24  
25  
26  
27  
28  
29  
30  
31  
32  
33  
34  
35  
36  
37  
38  
39  
40  
41  
42  
43  
44  
45  
46  
47  
48  
49  
50  
51  
52  
53  
54  
55  
56  
57  
58  
59  
60

For peer review only

1  
2  
3  
4 **OVERALL, GENDER AND SOCIAL INEQUALITIES IN**  
5  
6  
7 **SUICIDE MORTALITY IN IRAN, 2006-2010: A TIME TREND**  
8  
9  
10 **PROVINCE-LEVEL STUDY**

11  
12  
13 Aliasghar A. Kiadaliri

14  
15 Address: Lund University, Department of Clinical Sciences, Malmö; Skane University Hospital;  
16 20502 Malmö, Sweden. Email: aliasghar.ahmad\_kiadaliri@med.lu.se

17  
18  
19 Tel: +46(0)40391425 Fax: +46(0)40391370  
20  
21

22  
23 Aliasghar A. Kiadaliri<sup>1,2</sup>, Soheil Saadat<sup>3</sup>, Hossein Shahnavaizi<sup>4</sup>, Hassan Haghparast-Bidgoli<sup>5</sup>  
24

- 25  
26 1. Health Economics Unit, Department of Clinical Sciences, Lund University, Lund, Sweden  
27  
28 2. Research Centre for Health Services Management, Institute for Futures Studies in Health, Kerman  
29 University of Medical Sciences, Kerman, Iran  
30  
31 3. Sina Trauma and Surgery Research Centre, Tehran University of Medical Sciences, Tehran, Iran  
32  
33 4. Medical Records Department, Iranian Forensic Medicine Organization, Tehran, Iran  
34  
35 5. Institute for Global Health, University College London, London, UK  
36  
37

38 **Running Title:** Inequalities in suicide mortality in Iran

39  
40  
41 *Key words:* Suicide mortality, Social inequality, Overall inequality, Temporal analysis, Iran.  
42

43 Word Count: 3125  
44  
45  
46  
47  
48  
49  
50  
51  
52  
53  
54  
55  
56  
57  
58  
59  
60

## Abstract

**Objectives:** Suicide is a major global health problem imposing a considerable burden on population in terms of disability-adjusted life years. There has been an increasing trend in fatal and attempted suicide in Iran over the past few decades. The aim of the current study was to assess overall, gender and social inequalities across Iran's provinces during 2006-2010.

**Design:** Ecological study.

**Setting:** The data on distribution of population at the provinces were obtained from the Statistical Centre of Iran. The data on the annual number of death caused by suicide in each province were gathered from the Iranian Forensic Medicine Organization.

**Methods:** Suicide mortality rate per 100,000 population was calculated. Human Development Index was used as the provinces' social rank. Gini coefficient, rate ratio and Kunst and Mackenbach relative index of inequality ( $RII_{KM}$ ) were used to assess overall, gender and social inequalities, respectively. Annual percentage change was calculated using Joinpoint regression.

**Results:** Suicide mortality has slightly increased in Iran during 2006-2010. There was a substantial and constant overall inequality across the country over the study period. Male to female rate ratio was 2.34 (95% CI 1.45-3.79) over the same period. There were social inequalities in suicide mortality in favor of people in better-off provinces. In addition, there was an increasing trend in these social disparities over time, although it was not statistically significant.

**Conclusion:** We found substantial overall, gender and social disparities in the distribution of suicide mortality across the provinces in Iran. The findings showed that men in the provinces with low socio-economic status are at higher risk of suicide mortality. Further analyses are needed to explain these disparities.

## Article Summary

### *Strength and limitations of this study*

- This is the first national study to evaluate regional social inequalities in suicide mortality over five-year period.
- Social inequality in suicide mortality was evaluated using Cuzick's test for trend and two common inequality measures: rate ratio (RR) and Kunst and Mackenbach relative index of inequality (RII<sub>KM</sub>)
- Age and gender differences between the provinces were naïvely adjusted which might have not fully captured differences in age distribution across provinces.

## Introduction

Suicide is considered as one of the three leading causes of death among 15 to 44 years age group and the second cause of death in 15-19 years age group <sup>1</sup>. It imposes a considerable burden on population in terms of disability-adjusted life year (DALY) and it has been projected that suicide will compose about 2.4% of global burden of diseases by 2020 <sup>2</sup>.

Similar to other developing countries, Iran has been experienced a rapid increase in suicide rate during recent years. A recent study showed that suicide and attempted suicide in Iran have increased from 8.3 per 100,000 population in 2001 to 16.3 in 2007 <sup>3</sup>. Moreover, suicide account for 4% of the injury cases admitted to the general hospitals in the country <sup>4</sup>.

The risk factors of suicide are consisted of some demographical characteristics <sup>5</sup>, socio-economic situations <sup>6</sup> and medical conditions <sup>7</sup>. However, there are factors related to the area of residence that influence the suicide rate <sup>8</sup>. Evidence demonstrates persistent geographical disparities in distribution of suicide between and within countries which support area-level correlates of suicide <sup>9</sup>.

Iran is a Middle Eastern country with 1,628,550 square kilometer land area <sup>10</sup> and is consisted of 31 provinces <sup>11</sup> that are in different levels of development. Ethnic groups tend to reside in neighboring provinces. Therefore, there are variations in socioeconomic level and ethnicity across provinces as well as geographical and ecological differences that could cause a disparity among suicide mortality rate.

1  
2  
3 While information on the individual risk factors and outcomes of suicide attempts have been  
4 well documented in previous studies in Iran<sup>3, 4, 12-15</sup>, there is little information on the role of  
5 socio-economic factors and suicide incidence. In particular, there is no known study  
6 evaluating regional socio-economic disparities and their impact on suicide rate in Iran.  
7  
8

9  
10 To fill the gap, this study aimed to describe overall and social inequality in suicide mortality  
11 rates across all the provinces in Iran from 2006 to 2010. Though this is an ecological study, it  
12 will provide a useful starting point for examining the social disparity of suicide and provide  
13 valuable information for policy makers in order to prioritize prevention strategies.  
14  
15  
16  
17  
18  
19

## 20 METHODS

21  
22 The data on distribution of population at the provinces were obtained from the Statistical  
23 Centre of Iran. It should be noted that at the time of conducting the current study, Iran  
24 constituted of 30 provinces and it was later when Tehran province was split into two  
25 provinces. The data on the annual number of death caused by suicide in each province were  
26 gathered from the published reports<sup>16</sup> of Iranian Forensic Medicine Organization which is  
27 affiliated to the Judicial Authority in Iran. According to the Iranian law, all deaths due to  
28 external causes should be reported to this organization for examination and recording and to  
29 issue the death certificate. It is considered as the most reliable source of mortality data in Iran  
30<sup>17</sup>. Then, annual suicide mortality rates per 100,000 population were calculated for each  
31 province. Human Development Index (HDI) was used as the provinces' social rank and  
32 related data were obtained from the President Deputy of Strategic Planning and Control. The  
33 HDI is a composite index of three basic dimensions of human development, including life  
34 expectancy at birth, educational attainment (based on a combination of adult literacy rate and  
35 primary education to tertiary education enrolment rates), and income (based on GDP per head  
36 adjusted for purchasing-power parity [US\$])<sup>18</sup>. As a composite index, it is expected that HDI  
37 might capture socioeconomic development more comprehensively than single indicators such  
38 as average income or expenditures.  
39  
40  
41  
42  
43  
44  
45  
46  
47  
48  
49  
50  
51

52 Overall inequality measures inequalities in health irrespective of the other characteristics of  
53 the individuals<sup>19</sup>. To measure overall inequality we followed the same approach as  
54 measuring income inequality and used Lorenz curve and Gini coefficient. These two  
55 measures are commonly used in assessing overall inequality in distribution of health care  
56  
57  
58  
59  
60

resources and outcomes<sup>20-22</sup>. Lorenz curve is used to compare distribution of health measure with perfect equality (diagonal line). In the current study, Lorenz curve was plotted as the cumulative share of population ranked by suicide mortality rate, in an increasing order, against the cumulative share of suicide mortality. The further the distance from diagonal line implies the greater degree of inequality. The Gini coefficient is equal to twice the area between the Lorenz curve and diagonal and its value ranges from 0 (perfect equality) to one (maximum possible inequality). This measure takes into account the distribution of health variable across the entire population. In the current study, we used *fastgini* command in STATA to calculate Gini coefficient and its jackknife 95% confidence interval. **In order to examine gendered nature of suicide mortalities (i.e. gender inequality) in Iran,** we calculated the male to female rate ratio and its 95% confidence interval using negative binomial regression with a robust variance. As we had only data stratified by sex groups for the whole study period and not for every specific year, an overall rate ratio was calculated.

Social inequality was evaluated using Cuzick's test for trend and two common inequality measures: rate ratio (RR) and Kunst and Mackenbach relative index of inequality ( $RII_{KM}$ )<sup>23</sup>. Cuzick's test for trend is an extension of the Wilcoxon rank-sum test and is used as a non-parametric test for trend across ordered groups<sup>24</sup>. To calculate RR, the provinces were ranked and divided in five quintiles by HDI (weighted by their population). Then, negative binomial regression with a robust variance was used to calculate RR and its 95% confidence interval to compare the highest versus the lowest quintile. One problem with RR is that it only considers the population in two extreme socioeconomic groups. To take into account the whole population distribution across socioeconomic groups and also to remove differences in the size of socioeconomic groups, as a source of variation in the magnitude of health inequalities,  $RII_{KM}$  was calculated<sup>23</sup>. RII is widely used to measure social inequality and is recommended when making comparisons over time or across populations<sup>25</sup>. To calculate RII, after determine the relative position of the population in the provinces ranked by HDI, the number of deaths in the provinces was regressed on these relative ranks using negative binomial regression with a robust variance and population as offset variable. With the lowest social rank as reference, an  $RII_{KM}$  value greater (lesser) than 1 show that suicide mortality rate was higher among the provinces with higher (lower) social rank (more distance from 1 implies more inequality)<sup>21</sup>. To account for sex and age differences between the provinces, we also estimated adjusted  $RII_{KM}$  by including proportion of male in population, mean age of females and mean age of males in our negative binomial regression.

1  
2  
3 To examine temporal changes of suicide mortality rate across the provinces and also across  
4 the quintiles of HDI, we calculated annual percentage change (APC) and its 95% confidence  
5 interval for each province and quintile using the Joinpoint Regression Program 3.5.4.  
6 Moreover, this program was used to calculate APC of overall and socioeconomic inequality  
7 measures over study period. APC is estimated using following regression:  
8  
9

$$\text{Ln}(I_t) = b_0 + b_1(t)$$

$$\text{APC} = (e^{b_1} - 1) \times 100$$

10  
11  
12 Where  $I_t$  shows the suicide mortality rate and estimated inequality indices for year  $t$ .  
13  
14  
15  
16  
17

18  
19  
20 In a sensitivity analysis, Tehran was excluded from the analysis to examine **the overall**,  
21 gender and social inequalities across the remaining provinces. The reason for this was that  
22 Tehran has special situation as the capital of the country and being the centre of economic,  
23 social and political activities. Excel office and STATA version 11 (StataCorp LP, College  
24 Station, TX, USA) were used for statistical analysis.  
25  
26  
27  
28  
29  
30  
31

## 32 **Results**

33  
34 Table 1 shows mean population, HDI, suicide mortality rate and APC (%) across the  
35 provinces for years 2006-2010. Ilam and Hormozgan provinces had the highest and the  
36 lowest suicide mortality rate during the study period, respectively (8.8-fold difference). Most  
37 provinces (56.6%) had a suicide mortality rate of 3 to 6 per 100,000 population. In addition,  
38 suicide mortality rate was more prevalent among the western provinces of Iran (**Figure 1**).  
39  
40  
41  
42

43 The estimated APC values show that only five provinces experienced significant changes in  
44 suicide mortality rate over the study period (significant increases in Ilam, Isfahan, North  
45 Khorasan and Tehran provinces and significant decrease in Markazi province).  
46  
47  
48

49 Figure **2a** shows temporal changes of suicide mortality rate for the country. While the graph  
50 shows a slight increase in suicide mortality rate over the study period (from 4.25 in 2006 to  
51 4.88 in 2010), this was not statistically significant (APC=3.05%, P=0.23). Figure **2b** presents  
52 suicide mortality rates for five quintiles of HDI and examining the trends showed that APC  
53 was significant only in the highest quintile (APC=17.98, P=0.01). Figure **3** shows scatter  
54  
55  
56  
57  
58  
59  
60



graphs of HDI and suicide mortality rates. It is evident that the higher HDI was associated with the lower suicide mortality rate and Cuzick's test confirmed this ( $Z=-4.61$ ,  $P<0.011$ ).

Male to female rate ratio was 2.34 (95% CI 1.45-3.79) implying a significant higher suicide mortality rate among males than females over the study period. Examining this ratio in the provinces showed that in all provinces but Kordestan men had a higher suicide mortality rate than women. Excluding Tehran from the sample did not change this finding (2.33; 95% CI 1.43-3.79).

Table 2 presents the overall and social inequality measures in distribution of suicide mortality rate across the country through 2006-2010. The Gini coefficient ranged from 0.248 to 0.302 implying substantial overall inequality across the provinces. The Lorenz curves corresponded to this Gini coefficient is been shown in Figure 4. There was a 14.5% decrease in Gini coefficient between the first year and the last year of study implying decreasing overall inequality between these two points of time. Over the study period, the APC of Gini coefficient was -4.28 and statistically non-significant. Excluding Tehran resulted in a 6.9% increase in Gini coefficient between the first and the last year of the study period and a statistically non-significant APC of 1.42 was estimated.

RR was significantly lower than 1 in overall and for all years of the study period, implying a higher suicide mortality rate among people in the lowest quintile of HDI compared with the highest one. Over the study period, RR was approaching 1 and the APC of RR was 12.20 and statistically significant implying a decrease in the gap between the highest and the lowest social ranks. Although excluding Tehran from the sample did not change the overall picture of social inequality, an inverse trend (increasing social inequality) was observed.

$RII_{KM}$  was also lower than 1 in overall and for all years of the study, showing a persistent inequality in favor of people living in the provinces with higher social rank. Temporal analysis showed that  $RII_{KM}$  did not significantly change over the study period. Adjusting for age and sex this observation. When we excluded the Tehran province, the APC value for adjusted  $RII_{KM}$  was statistically significant showing an increase in social disparity across the remaining provinces in Iran.

## Discussion

In this study, for the first time, we assessed overall and social disparities in the distribution of suicide mortality across the provinces of Iran over a period of five years (2006-2010). The

1  
2  
3 findings showed that suicide mortality has slightly increased over the study period. The  
4 findings also indicated that there were substantial overall, gender and social disparities in the  
5 distribution of suicide mortality across the country, and it was higher in the provinces with  
6 lower social rank. These disparities were generally stable and persistent over the study  
7 period.  
8  
9  
10

11  
12 The findings from the current study showed an inverse association between the provinces'  
13 social rank and suicide mortality in Iran. Although the studies on association between area  
14 social rank and suicide mortality reported mixed results<sup>9,26</sup>, the results of this study is in line  
15 with previous ecological studies investigating the relationship between socioeconomic  
16 characteristics and suicide rate, in particular the studies focused on high income settings<sup>9,27-</sup>  
17  
18  
19  
20  
21  
22  
23  
24  
25  
26  
27  
28  
29  
30  
31  
32  
33  
34  
35  
36  
37  
38  
39  
40  
41  
42  
43  
44  
45  
46  
47  
48  
49  
50  
51  
52  
53  
54  
55  
56  
57  
58  
59  
60

33. Rehkopf and Buka<sup>9</sup> in their systematic review of suicide and socioeconomic characteristics of geographical areas found that, among studies with statistically significant results, 50% and 73% of studies reported an inverse relation between area income and education characteristics and completed suicide, respectively. They also found that the probability of reporting an inverse relationship between area social rank and suicide mortality was higher among the studies conducted in Asia (94% of studies with statistically significant results)<sup>9</sup>. Similar finding was reported by another study<sup>34</sup> focusing on the countries in Eastern Mediterranean region (where Iran is located), indicating that high income countries had lower suicide mortality rate than their low and middle income counterparts. It is argued that people in the provinces with lower social rank generally have more adverse experiences, poorer mental health, lower access to psychiatric services, and lower access to health facilities. These factors might partly explain higher suicide mortality rate in the provinces with lower social rank in Iran.

43 The four Western provinces of Iran (i.e., Ilam, Kermanshah, Lorestan and Hamedan) had the  
44 highest suicide mortality rate in the country. One potential explanation for this observation  
45 can be low socioeconomic status of these provinces. These provinces are among the  
46 provinces with the highest unemployment rate and the lowest HDI in the country. High  
47 divorce rates in these provinces (except for Ilam) can be another potential explanation **as**  
48 **divorce is considered as a risk factor for suicide mortality**<sup>35,36</sup>. In addition, cultural issues  
49 such as the tribal structure of communities and the extreme fanaticism prevailing in these  
50 provinces have been considered as another potential explanation for this finding<sup>37</sup>.  
51  
52  
53  
54  
55  
56  
57  
58  
59  
60

1  
2  
3 The high gender gap in suicide mortality rate observed in the current study is in line with the  
4 previous epidemiological studies in Iran<sup>3, 4, 14</sup> and is comparable to the studies conducted in  
5 other settings, in particular high income countries<sup>6, 9, 38, 39</sup>. Although many studies, including  
6 the previous studies in Iran<sup>3, 4, 14</sup>, have shown higher suicide attempt rate among females,  
7 completed (fatal) suicides are higher among males. One potential explanation can be the  
8 difference in methods of attempting suicide among males and females. For example, the most  
9 common methods of attempting suicide used by males in Iran are hanging and firearms which  
10 have higher fatality rate compared with self-burning method commonly used by females<sup>3, 14,</sup>  
11 <sup>39, 40</sup>. Greater psychosocial impact of problems, such as unemployment or retirement, on  
12 males compared to female<sup>39, 41, 42</sup> and adopting coping strategies such as emotional  
13 inexpressiveness, lack of help-seeking, risk-taking behaviour, violence, alcohol and drug  
14 abuse by males (which are triggered by norms of traditional masculinity)<sup>43, 44</sup> are other  
15 potential factors which have been discussed in the literature. The findings of the gender  
16 analysis are important for designing and implementing suicide prevention strategies as the  
17 factors, patterns, and behaviours associated with suicide are affected by gender.  
18  
19  
20  
21  
22  
23  
24  
25  
26  
27  
28  
29  
30

31 Temporal analysis of suicide mortality showed interesting results indicating that among five  
32 quintiles of HDI, it was only the highest quintile that experienced a significant change in  
33 suicide mortality over the study period. This finding potentially can be explained by  
34 increasing prevalence of mental disorders, raising unemployment rate<sup>13, 45</sup> and increasing  
35 trend in divorce rate<sup>13</sup> in the provinces with higher HDI, such as Tehran, the capital city of  
36 Iran.  
37  
38  
39  
40

41 To our knowledge, this is the first national study evaluating social inequalities across  
42 different regions over time. Although this study conducted in the context of Iran, however,  
43 the findings may also be applicable to other middle-income countries, in particular countries  
44 in the Middle East region, which share similar culture. Moreover, we believe that, in terms of  
45 methodology, our analysis present a good example for employing a triangulation of different  
46 methods for evaluating inequalities in suicide mortalities. However, the current study has  
47 several limitations that should be considered when interpreting its findings. Firstly, age and  
48 gender differences between the provinces were naïvely adjusted which might have not fully  
49 captured differences in age distribution across provinces. Secondly, there is the issue of  
50 availability and quality of data on suicide which is common in developing countries settings  
51 <sup>26, 46</sup> and leads to underestimation and misclassification of suicide. This might be an issue in  
52  
53  
54  
55  
56  
57  
58  
59  
60

1  
2  
3 this study because of the social stigma of suicide and religious sanctions and some legal  
4 issues in the Iranian context <sup>34, 4</sup>. Moreover, the underestimation and misclassification of  
5 suicide mortality might be more common in the provinces with lower social rank; therefore,  
6 we expect that the social disparity to be more profound than what has been reported here.  
7  
8 Thirdly, the current study is an ecological study using province as unit of analysis which  
9 embraces substantial heterogeneity within provinces. This implies that the observed  
10 disparities in suicide mortality are between-provinces and it is not necessarily applicable to  
11 smaller geographic units or individuals. Furthermore, no causal inference can be drawn due  
12 to ecological nature of the study and that there was no control for confounders in this study.  
13  
14  
15  
16  
17  
18

### 19 **Conclusion**

20  
21 The present study indicated that there were substantial overall, gender and social disparities  
22 in the distribution of suicide mortalities across the provinces in Iran. Moreover, the study  
23 showed an inverse association between the provinces' social rank and suicide mortality. The  
24 findings imply that prevention resources should be targeted high risk groups, in particular  
25 men in the provinces with low socio-economic status. Further investigations are needed to  
26 explain these disparities in suicide mortality across the provinces. Moreover, more studies  
27 needed to explore the association of socio-economic factors and suicide (attempt and fatal)  
28 focusing on the smaller geographical units and at the individual level in order to design better  
29 prevention strategies.  
30  
31  
32  
33  
34  
35  
36

### 37 **List of Abbreviations**

38  
39 DALY: Disability-adjusted Life Years, HDI: Human Development Index, RR: rate ratio,  
40 RII<sub>KM</sub>: Kunst and Mackenbach relative index of inequality, APC: annual percentage change  
41  
42  
43

### 44 **Competing interests**

45  
46 The authors declare that they have no competing interests. No funding has been received for  
47 the conduct of this study and/or preparation of this manuscript.  
48  
49  
50

### 51 **Authors' contributions**

52  
53 AAK was involved in the study conception and design, data collection and analysis,  
54 interpretation of the data, and writing the manuscript. HHB and SS were involved in the  
55 study design, results interpretation, and writing the manuscript. HS was involved in the study  
56  
57  
58  
59  
60

design, data collection and finalization of the manuscript. All authors read and approved the final manuscript.

### Funding

No funding has been received for the conduct of this study and/or preparation of this manuscript.

### References

1. Patton GC, Coffey C, Sawyer SM, Viner RM, Haller DM, Bose K, Vos T, Ferguson J, Mathers CD: Global patterns of mortality in young people: a systematic analysis of population health data. *Lancet* 2009, 374:881-892.
2. Bertolote JM, Fleischmann A: A Global Perspective On the Magnitude of Suicide Mortality. In *Oxford Textbook of Suicidology and Suicide Prevention: a global perspective*. Oxford University Press; 2009: 91-98
3. Saberi-Zafaghani MB, Hajebi A, Eskandarieh S, Ahmadzad-Asl M: Epidemiology of suicide and attempted suicide derived from the health system database in the Islamic Republic of Iran: 2001-2007. *East Mediterr Health J* 2012, 18:836-841.
4. Sharif-Alhoseini M, Rasouli MR, Saadat S, Haddadi M, Gooya MM, Afsari M, Rahimi-Movaghar V: Suicide attempts and suicide in Iran: results of national hospital surveillance data. *Public Health* 2012.992-126:990 ,
5. WHO (2012). *Public health action for the prevention of suicide: a framework*. World Health Organization, Geneva.
6. Pompili M, Innamorati M, Vichi M, Masocco M, Vanacore N, Lester D, Serafini G, Tatarelli R, De Leo D, Girardi P: Inequalities and impact of socioeconomic-cultural factors in suicide rates across Italy. *Crisis* 2011, 32:178-185.
7. Ikeda RM, Kresnow MJ, Mercy JA, Powell KE, Simon TR, Potter LB, Durant TM, Swahn MH: Medical conditions and nearly lethal suicide attempts. *Suicide Life Threat Behav* 2001, 32:60-67.
8. Hirsch JK: A review of the literature on rural suicide: risk and protective factors, incidence, and prevention. *Crisis* 2006, 27:189-199.
9. Rehkopf DH, Buka SL: The association between suicide and the socio-economic characteristics of geographical areas: a systematic review. *Psychol Med* 2006, 36:145-157.
10. World Bank (2013). Islamic Republic of Iran. <http://data.worldbank.org/country/iran-islamic-republic>. Accessed 15.09.2013.
11. Statistical Center of Iran (2013). Iran at a glance. <http://www.amar.org.ir/Default.aspx?tabid=1321>. Accessed 15.09.2013
12. Farzaneh E, Mehrpour O, Alfred S, Moghaddam HH, Behnoush B, Seghatoleslam T: Self-poisoning suicide attempts among students in Tehran, Iran. *Psychiatr Danub* 2010, 22:34-38.
13. Nazarzadeh M, Bidel Z, Ayubi E, Asadollahi K, Carson KV, Sayehmiri K: Determination of the social related factors of suicide in Iran: a systematic review and meta-analysis. *BMC Public Health* 2013, 13:4.

14. Shirazi HR, Hosseini M, Zoladl M, Malekzadeh M, Momeninejad M, Noorian K, Mansorian MA: Suicide in the Islamic Republic of Iran: an integrated analysis from 1981 to 2007. *East Mediterr Health* 2012, 18:607-613.
15. Taghaddosinejad F, Sheikhezadi A, Behnoush B, Reshadati J, Sabery SH: A survey of suicide by burning in Tehran, Iran. *Acta Med Iran* 2010, 4:272-8:266
16. Khademi A, Moradi S: Statistical Investigation of Unnatural Deaths in Iran (2001-2010). Forensic Medicine Organization, Tehran, Iran.
17. Montazeri A :Road-traffic-related mortality in Iran: a descriptive study. *Public Health* 2004, 118:110-113.
18. United Nations Development Program: Human Development Index (HDI). <http://hdr.undp.org/en/statistics/hdi/> accessed 01December 2013.
19. Wagstaff A, van Doorslaer E: Overall versus socioeconomic health inequality: a measurement framework and two empirical illustrations. *Health Econ* 2004, 13(3):297-301.
20. Ahmad Kiadaliri A, Najafi B, Haghparast-Bidgoli H: Geographic distribution of need and access to health care in rural population: an ecological study in Iran. *Int J Equity Health* 2011, 10:39.
21. Kiadaliri AA, Hosseinpour R, Haghparast-Bidgoli H, Gerdtham UG: Pure and social disparities in distribution of dentists: a cross-sectional province-based study in Iran. *Int J Environ Res Public Health* 2013, 10:1882-1894.
22. Shen J, Wildman J, Steele J: Measuring and decomposing oral health inequalities in an UK population. *Community Dent Oral Epidemiol* 2013, 41:481-489.
23. Mackenbach JP, Kunst AE: Measuring the magnitude of socio-economic inequalities in health: an overview of available measures illustrated with two examples from Europe. *Soc Sci Med* 1997, 44:757-771.
24. Cuzick J: A Wilcoxon-type test for trend. *Stat Med* 1985, 4:87-90.
25. Cavelaars AE, Kunst AE, Geurts JJ, Crialesi R, Grotvedt L, Helmert U, Lahelma E, Lundberg O, Matheson J, Mielck A, et al: Educational differences in smoking: international comparison. *BMJ* 2000, 320:1102-1107.
26. Bando DH, Brunoni AR, Bensenor IM, Lotufo PA: Suicide rates and income in Sao Paulo and Brazil: a temporal and spatial epidemiologic analysis from 1996 to 2008. *BMC Psychiatry* 2012, 12:127.
27. Chang SS, Sterne JA, Wheeler BW, Lu TH, Lin JJ, Gunnell D: Geography of suicide in Taiwan: spatial patterning and socioeconomic correlates. *Health Place* 2011, 17:641-650.
28. Fukuda Y, Nakamura K, Takano T: Cause-specific mortality differences across socioeconomic position of municipalities in Japan, 1973-1977 and 1993-1998: increased importance of injury and suicide in inequality for ages under 75. *Int J Epidemiol* 2005, 34:100-109.
29. Martiello MA, Giacchi MV: Ecological study of isolation and suicide in Tuscany (Italy). *Psychiatry Res* 2012, 198:68-73.
30. Rezaeian M, Dunn G, St Leger S, Appleby L: Ecological association between suicide rates and indices of deprivation in the north west region of England: the importance of the size of the administrative unit. *J Epidemiol Community Health* 2006, 60:956-961.
31. Taylor R, Page A, Morrell S, Harrison J, Carter G: Mental health and socio-economic variations in Australian suicide. *Soc Sci Med* 2005, 61:1551-1559.



- 1
- 2
- 3 32. Tondo L, Albert MJ, Baldessarini RJ: Suicide rates in relation to health care access in
- 4 the United States :an ecological study. *J Clin Psychiatry* 2006, 67:517-523.
- 5
- 6 33. Ying YH, Chang K: A study of suicide and socioeconomic factors. *Suicide Life Threat*
- 7 *Behav* 2009, 39:214-226.
- 8
- 9 34. Rezaeian M: Age and sex suicide rates in the Eastern Mediterranean Region based on
- 10 global burden of disease estimates for 2000. *East Mediterr Health J* 2007, 13:953-
- 11 960.
- 12 35. Kposowa AJ: Marital status and suicide in the National Longitudinal Mortality Study. *J*
- 13 *Epidemiol Community Health* 2000,54(4):254-61.
- 14 36. Corcoran P, Nagar A: Suicide and marital status in Northern Ireland. *Soc Psychiatry*
- 15 *Psychiatr Epidemiol* 2010,45(8):795-800.
- 16 37. Aliverdina A, Pridemore WA: Women's fatalistic suicide in Iran: a partial test of
- 17 Durkheim in an Islamic Republic. *Violence Against Women* 2009, 15:307-320.
- 18 38. Cleary A: Suicidal action, emotional expression, and the performance of
- 19 masculinities. *Soc Sci Med* 2012, 74:498-505.
- 20 39. Cheong KS, Choi MH, Cho BM, Yoon TH, Kim CH, Kim YM, Hwang IK: Suicide rate
- 21 differences by sex, age, and urbanicity, and related regional factors in Korea. *J Prev*
- 22 *Med Public Health* 2012, 45:70-77.
- 23 40. Shojaei A, Moradi S, Alaeddini F, Khodadoost M, Barzegar A, Khademi A: Association
- 24 between suicide method, and gender, age, and education level in Iran over 2006-
- 25 2010. *Asia Pac Psychiatry* 2014,6(1):18-22.
- 26 41. Qin P, Agerbo E, Mortensen PB: Suicide risk in relation to socioeconomic,
- 27 demographic, psychiatric, and familial factors: A national register-based study of all
- 28 suicides in Denmark, 1981-1997. *Am J Psychiat* 2003, 160:765-772.
- 29 42. Qin P, Agerbo E, Westergard-Nielsen N, Eriksson T, Mortensen PB: Gender
- 30 differences in risk factors for suicide in Denmark. *Br J Psychiatry* 2000, 177:546-50.
- 31 43. Hawton K: Sex and suicide - Gender differences in suicidal behaviour. *Brit J Psychiat*
- 32 2000, 177:484-485.
- 33 44. Moller-Leimkuhler AM: The gender gap in suicide and premature death or: why are
- 34 men so vulnerable? *Eur Arch Psychiatry Clin Neurosci* 2003, 253:1-8.
- 35 45. Sheikholeslami H, Kani C, Ziaee A: Attempted suicide among Iranian population.
- 36 *Suicide Life Threat Behav* 2008, 38:456-466.
- 37 46. Vijayakumar L, Nagaraj K, Pirkis J, Whiteford H: Suicide in developing countries :(1)
- 38 frequency, distribution, and association with socioeconomic indicators. *Crisis* 2005,
- 39 26:104-111.
- 40
- 41
- 42
- 43
- 44
- 45
- 46
- 47
- 48
- 49
- 50
- 51
- 52
- 53
- 54
- 55
- 56
- 57
- 58
- 59
- 60

Table 1. Mean population, human development index (HDI), suicide mortality rate and annual percentage change across the provinces in Iran, 2006-2010 (Ranked by Suicide mortality rate).

|                          | Population | HDI   | Suicide mortality rate per 100,000 population | APC (%)*      |
|--------------------------|------------|-------|-----------------------------------------------|---------------|
| Ilam                     | 555,929    | 0.729 | 19.53                                         | <b>10.11</b>  |
| Kermanshah               | 1,892,100  | 0.748 | 13.74                                         | 0.46          |
| Lorestan                 | 1,736,946  | 0.761 | 10.64                                         | 1.18          |
| Hamedan                  | 1,700,960  | 0.740 | 9.59                                          | -1.52         |
| Gilan                    | 2,428,553  | 0.769 | 6.52                                          | 9.98          |
| Ardebil                  | 1,235,234  | 0.735 | 6.22                                          | -2.32         |
| East Azerbaijan          | 3,646,459  | 0.763 | 5.58                                          | 1.31          |
| Zanjan                   | 973,739    | 0.752 | 5.53                                          | 12.14         |
| Kohgiluyeh & Boyer-Ahmad | 651,577    | 0.718 | 5.25                                          | -4.20         |
| Khuzestan                | 4,372,242  | 0.762 | 5.11                                          | -7.13         |
| West Azerbaijan          | 2,944,224  | 0.713 | 4.72                                          | -2.74         |
| Kordestan                | 1,453,503  | 0.713 | 4.69                                          | 5.25          |
| Golestan                 | 1,651,708  | 0.737 | 4.49                                          | 5.67          |
| Overall (Iran)           | 72,599,045 | 0.758 | 4.46                                          | 3.05          |
| Qazvin                   | 1,177,582  | 0.783 | 4.25                                          | -1.13         |
| North Khorasan           | 824,979    | 0.759 | 4.24                                          | <b>10.64</b>  |
| Fars                     | 4,431,684  | 0.783 | 4.16                                          | 1.56          |
| Chaharmahal Bakhtiari    | 875,207    | 0.749 | 4.00                                          | -7.72         |
| Qom                      | 1,087,011  | 0.773 | 3.75                                          | 7.89          |
| Mazandaran               | 2,979,189  | 0.745 | 3.66                                          | -5.71         |
| Isfahan                  | 4,680,831  | 0.810 | 3.64                                          | <b>4.62</b>   |
| Kerman                   | 2,799,417  | 0.750 | 3.10                                          | -5.03         |
| Bushehr                  | 914,710    | 0.786 | 3.02                                          | 15.55         |
| South Khorasan           | 656,469    | 0.723 | 3.02                                          | -2.28         |
| Tehran                   | 14,106,297 | 0.843 | 2.92                                          | <b>17.98</b>  |
| Yazd                     | 1,028,152  | 0.809 | 2.68                                          | -4.48         |
| Razavi Khorasan          | 5,765,706  | 0.777 | 2.66                                          | -2.64         |
| Semnan                   | 606,982    | 0.814 | 2.60                                          | 4.27          |
| Markazi                  | 1,371,514  | 0.785 | 2.38                                          | <b>-10.73</b> |
| Sistan & Baluchestan     | 2,569,107  | 0.643 | 2.23                                          | 6.11          |
| Hormozgan                | 1,481,031  | 0.766 | 2.21                                          | -5.59         |

\*Bold figures show statistically significant results (p<0.05)



1  
2  
3  
4  
5  
6  
7  
8  
9  
10  
11  
12  
13  
14  
15  
16  
17  
18  
19  
20  
21  
22  
23  
24  
25  
26  
27  
28  
29  
30  
31  
32  
33  
34  
35  
36  
37  
38  
39  
40  
41  
42  
43  
44  
45  
46  
47  
48  
49

Table 2. Overall and social inequality measures of suicide mortality in Iran, 2006-2010.

|                                | Total sample (n=30) |                     |                     |                     |                     | Overall             | APC (Pvalue)   |
|--------------------------------|---------------------|---------------------|---------------------|---------------------|---------------------|---------------------|----------------|
|                                | 2006                | 2007                | 2008                | 2009                | 2010                |                     |                |
| Gini index                     | 0.290 (0.193-0.386) | 0.302 (0.212-0.392) | 0.271 (0.182-0.361) | 0.268 (0.165-0.371) | 0.248 (0.151-0.345) | 0.281 (0.240-0.322) | -4.28 (0.050)  |
| Rate ratio*                    | 0.359 (0.256-0.503) | 0.325 (0.225-0.469) | 0.428 (0.284-0.646) | 0.496 (0.296-0.830) | 0.535 (0.316-0.906) | 0.426 (0.275-0.659) | 12.20 (0.049)  |
| RII <sub>KM</sub>              | 0.345 (0.174-0.686) | 0.257 (0.127-0.521) | 0.289 (0.142-0.588) | 0.337 (0.147-0.776) | 0.341 (0.148-0.784) | 0.339 (0.166-0.671) | 1.75 (0.745)   |
| Adjusted RII <sub>KM</sub> **  | 0.279 (0.129-0.600) | 0.205 (0.098-0.431) | 0.224 (0.102-0.489) | 0.133 (0.039-0.455) | 0.160 (0.051-0.507) | 0.171 (0.054-0.548) | -13.75 (0.073) |
| Sample excluding Tehran (n=29) |                     |                     |                     |                     |                     |                     |                |
| Gini index                     | 0.259 (0.168-0.350) | 0.285 (0.187-0.382) | 0.282 (0.187-0.378) | 0.292 (0.192-0.392) | 0.277 (0.191-0.363) | 0.282 (0.243-0.322) | 1.42 (0.38)    |
| Rate ratio*                    | 0.646 (0.444-0.938) | 0.397 (0.226-0.695) | 0.415 (0.247-0.696) | 0.520 (0.277-0.974) | 0.492 (0.262-0.924) | 0.584 (0.380-0.896) | -6.59 (0.403)  |
| RII <sub>KM</sub>              | 0.460 (0.257-0.823) | 0.339 (0.179-0.644) | 0.352 (0.185-0.672) | 0.397 (0.187-0.839) | 0.389 (0.185-0.819) | 0.411 (0.215-0.785) | -2.76 (0.575)  |
| Adjusted RII <sub>KM</sub> **  | 0.402 (0.224-0.722) | 0.301 (0.168-0.541) | 0.310 (0.165-0.580) | 0.211 (0.077-0.577) | 0.241 (0.093-0.623) | 0.241 (0.090-0.649) | -12.95 (0.045) |

\*The highest vs. the lowest quintile of HDI  
 \*\*Adjusted for proportion of males and mean age of males and females in the provinces.

1  
2  
3 **Figure 1. Distribution of suicide mortality rate across the provinces in Iran.**  
4

5 **Figure 1.** Suicide mortality rates per 100,000 populations in a) total sample; b) quintiles of  
6 HDI, 2006-2010.  
7

8  
9 **Figure 2.** Scatter plots of HDI and suicide mortality rates, stratified by year of study.  
10

11 **Figure 3.** Lorenz curves of the distribution of suicide mortality in Iran, 2006-2010.  
12  
13  
14  
15  
16  
17  
18  
19  
20  
21  
22  
23  
24  
25  
26  
27  
28  
29  
30  
31  
32  
33  
34  
35  
36  
37  
38  
39  
40  
41  
42  
43  
44  
45  
46  
47  
48  
49  
50  
51  
52  
53  
54  
55  
56  
57  
58  
59  
60

For peer review only

1  
2  
3  
4  
5  
6  
7  
8  
9  
10  
11  
12  
13  
14  
15  
16  
17  
18  
19  
20  
21  
22  
23  
24  
25  
26  
27  
28  
29  
30  
31  
32  
33  
34  
35  
36  
37  
38  
39  
40  
41  
42  
43  
44  
45  
46  
47  
48  
49  
50  
51  
52  
53  
54  
55  
56  
57  
58  
59  
60

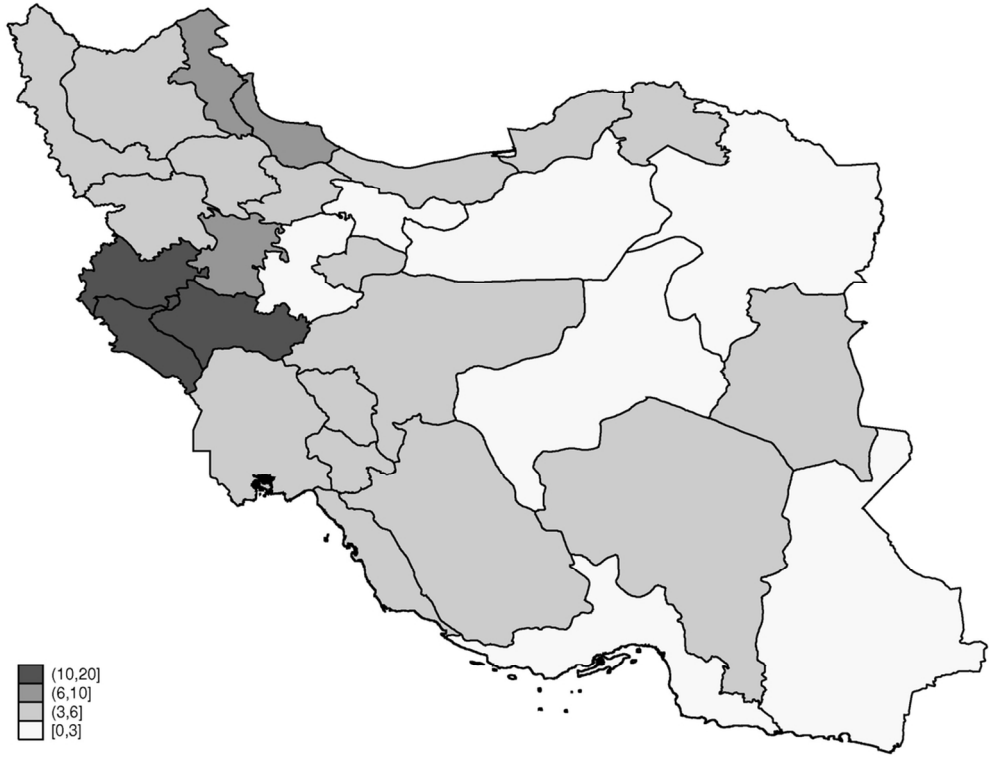

101x77mm (300 x 300 DPI)

Review only

1  
2  
3  
4  
5  
6  
7  
8  
9  
10  
11  
12  
13  
14  
15  
16  
17  
18  
19  
20  
21  
22  
23  
24  
25  
26  
27  
28  
29  
30  
31  
32  
33  
34  
35  
36  
37  
38  
39  
40  
41  
42  
43  
44  
45  
46  
47  
48  
49  
50  
51  
52  
53  
54  
55  
56  
57  
58  
59  
60

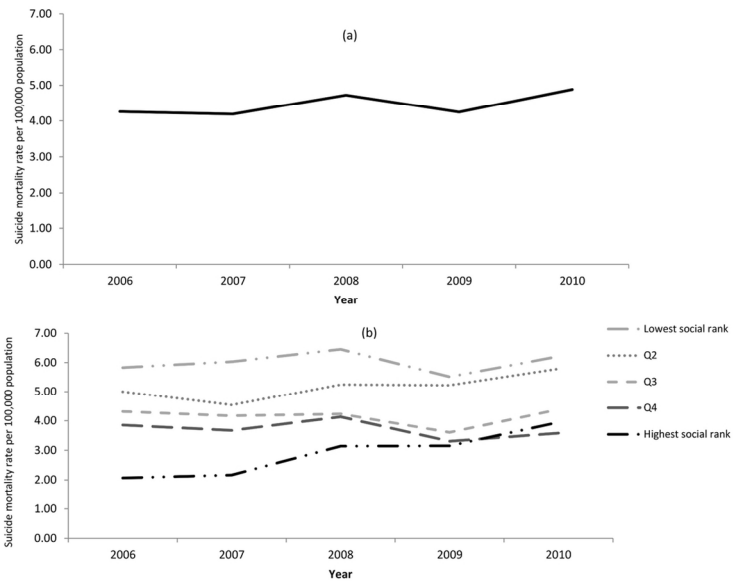

130x101mm (300 x 300 DPI)

Review only

1  
2  
3  
4  
5  
6  
7  
8  
9  
10  
11  
12  
13  
14  
15  
16  
17  
18  
19  
20  
21  
22  
23  
24  
25  
26  
27  
28  
29  
30  
31  
32  
33  
34  
35  
36  
37  
38  
39  
40  
41  
42  
43  
44  
45  
46  
47  
48  
49  
50  
51  
52  
53  
54  
55  
56  
57  
58  
59  
60

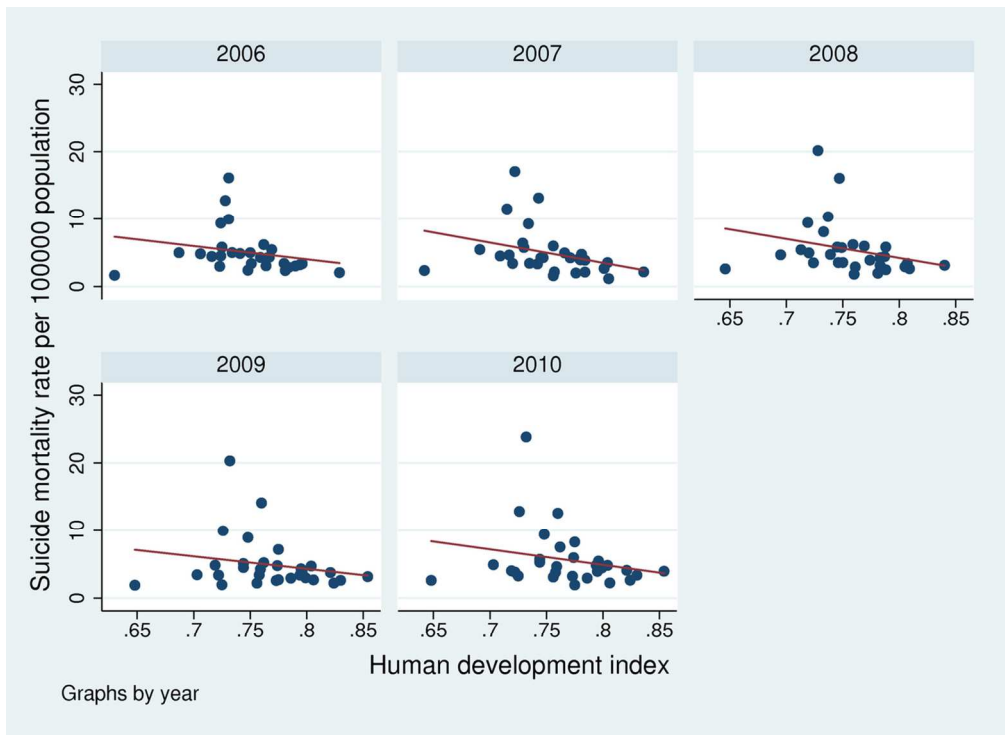

116x84mm (300 x 300 DPI)

View only

1  
2  
3  
4  
5  
6  
7  
8  
9  
10  
11  
12  
13  
14  
15  
16  
17  
18  
19  
20  
21  
22  
23  
24  
25  
26  
27  
28  
29  
30  
31  
32  
33  
34  
35  
36  
37  
38  
39  
40  
41  
42  
43  
44  
45  
46  
47  
48  
49  
50  
51  
52  
53  
54  
55  
56  
57  
58  
59  
60

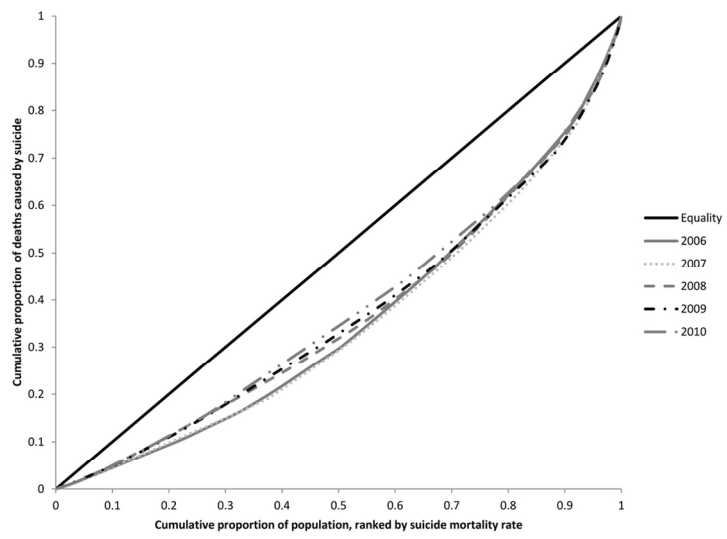

130x101mm (300 x 300 DPI)

ew only

## STROBE Statement—checklist of items that should be included in reports of observational studies

|                              | Item No   | Recommendation                                                                                                                                                                                                                                                                                                                                                                                                                                                                                                                                                                                                                                                                                   |
|------------------------------|-----------|--------------------------------------------------------------------------------------------------------------------------------------------------------------------------------------------------------------------------------------------------------------------------------------------------------------------------------------------------------------------------------------------------------------------------------------------------------------------------------------------------------------------------------------------------------------------------------------------------------------------------------------------------------------------------------------------------|
| <b>Title and abstract</b>    | <b>1</b>  | (a) Indicate the study's design with a commonly used term in the title or the abstract<br>(b) Provide in the abstract an informative and balanced summary of what was done and what was found                                                                                                                                                                                                                                                                                                                                                                                                                                                                                                    |
| <b>Introduction</b>          |           |                                                                                                                                                                                                                                                                                                                                                                                                                                                                                                                                                                                                                                                                                                  |
| Background/rationale         | <b>2</b>  | Explain the scientific background and rationale for the investigation being reported                                                                                                                                                                                                                                                                                                                                                                                                                                                                                                                                                                                                             |
| Objectives                   | <b>3</b>  | State specific objectives, including any prespecified hypotheses                                                                                                                                                                                                                                                                                                                                                                                                                                                                                                                                                                                                                                 |
| <b>Methods</b>               |           |                                                                                                                                                                                                                                                                                                                                                                                                                                                                                                                                                                                                                                                                                                  |
| Study design                 | <b>4</b>  | Present key elements of study design early in the paper                                                                                                                                                                                                                                                                                                                                                                                                                                                                                                                                                                                                                                          |
| Setting                      | <b>5</b>  | Describe the setting, locations, and relevant dates, including periods of recruitment, exposure, follow-up, and data collection                                                                                                                                                                                                                                                                                                                                                                                                                                                                                                                                                                  |
| Participants                 | <b>6</b>  | (a) <i>Cohort study</i> —Give the eligibility criteria, and the sources and methods of selection of participants. Describe methods of follow-up<br><i>Case-control study</i> —Give the eligibility criteria, and the sources and methods of case ascertainment and control selection. Give the rationale for the choice of cases and controls<br><i>Cross-sectional study</i> —Give the eligibility criteria, and the sources and methods of selection of participants<br>(b) <i>Cohort study</i> —For matched studies, give matching criteria and number of exposed and unexposed<br><i>Case-control study</i> —For matched studies, give matching criteria and the number of controls per case |
| Variables                    | <b>7</b>  | Clearly define all outcomes, exposures, predictors, potential confounders, and effect modifiers. Give diagnostic criteria, if applicable                                                                                                                                                                                                                                                                                                                                                                                                                                                                                                                                                         |
| Data sources/<br>measurement | <b>8*</b> | For each variable of interest, give sources of data and details of methods of assessment (measurement). Describe comparability of assessment methods if there is more than one group                                                                                                                                                                                                                                                                                                                                                                                                                                                                                                             |
| Bias                         | <b>9</b>  | Describe any efforts to address potential sources of bias                                                                                                                                                                                                                                                                                                                                                                                                                                                                                                                                                                                                                                        |
| Study size                   | <b>10</b> | Explain how the study size was arrived at                                                                                                                                                                                                                                                                                                                                                                                                                                                                                                                                                                                                                                                        |
| Quantitative variables       | <b>11</b> | Explain how quantitative variables were handled in the analyses. If applicable, describe which groupings were chosen and why                                                                                                                                                                                                                                                                                                                                                                                                                                                                                                                                                                     |
| Statistical methods          | <b>12</b> | (a) Describe all statistical methods, including those used to control for confounding<br>(b) Describe any methods used to examine subgroups and interactions<br>(c) Explain how missing data were addressed<br>(d) <i>Cohort study</i> —If applicable, explain how loss to follow-up was addressed<br><i>Case-control study</i> —If applicable, explain how matching of cases and controls was addressed<br><i>Cross-sectional study</i> —If applicable, describe analytical methods taking account of sampling strategy<br>(e) Describe any sensitivity analyses                                                                                                                                |

Continued on next page

**Results**

|                  |     |                                                                                                                                                                                                                                                                                                                                                                                                               |
|------------------|-----|---------------------------------------------------------------------------------------------------------------------------------------------------------------------------------------------------------------------------------------------------------------------------------------------------------------------------------------------------------------------------------------------------------------|
| Participants     | 13* | (a) Report numbers of individuals at each stage of study—eg numbers potentially eligible, examined for eligibility, confirmed eligible, included in the study, completing follow-up, and analysed<br>(b) Give reasons for non-participation at each stage<br>(c) Consider use of a flow diagram                                                                                                               |
| Descriptive data | 14* | (a) Give characteristics of study participants (eg demographic, clinical, social) and information on exposures and potential confounders<br>(b) Indicate number of participants with missing data for each variable of interest<br>(c) <i>Cohort study</i> —Summarise follow-up time (eg, average and total amount)                                                                                           |
| Outcome data     | 15* | <i>Cohort study</i> —Report numbers of outcome events or summary measures over time<br><i>Case-control study</i> —Report numbers in each exposure category, or summary measures of exposure<br><i>Cross-sectional study</i> —Report numbers of outcome events or summary measures                                                                                                                             |
| Main results     | 16  | (a) Give unadjusted estimates and, if applicable, confounder-adjusted estimates and their precision (eg, 95% confidence interval). Make clear which confounders were adjusted for and why they were included<br>(b) Report category boundaries when continuous variables were categorized<br>(c) If relevant, consider translating estimates of relative risk into absolute risk for a meaningful time period |
| Other analyses   | 17  | Report other analyses done—eg analyses of subgroups and interactions, and sensitivity analyses                                                                                                                                                                                                                                                                                                                |

**Discussion**

|                  |    |                                                                                                                                                                            |
|------------------|----|----------------------------------------------------------------------------------------------------------------------------------------------------------------------------|
| Key results      | 18 | Summarise key results with reference to study objectives                                                                                                                   |
| Limitations      | 19 | Discuss limitations of the study, taking into account sources of potential bias or imprecision. Discuss both direction and magnitude of any potential bias                 |
| Interpretation   | 20 | Give a cautious overall interpretation of results considering objectives, limitations, multiplicity of analyses, results from similar studies, and other relevant evidence |
| Generalisability | 21 | Discuss the generalisability (external validity) of the study results                                                                                                      |

**Other information**

|         |    |                                                                                                                                                               |
|---------|----|---------------------------------------------------------------------------------------------------------------------------------------------------------------|
| Funding | 22 | Give the source of funding and the role of the funders for the present study and, if applicable, for the original study on which the present article is based |
|---------|----|---------------------------------------------------------------------------------------------------------------------------------------------------------------|

\*Give information separately for cases and controls in case-control studies and, if applicable, for exposed and unexposed groups in cohort and cross-sectional studies.

**Note:** An Explanation and Elaboration article discusses each checklist item and gives methodological background and published examples of transparent reporting. The STROBE checklist is best used in conjunction with this article (freely available on the Web sites of PLoS Medicine at <http://www.plosmedicine.org/>, Annals of Internal Medicine at <http://www.annals.org/>, and Epidemiology at <http://www.epidem.com/>). Information on the STROBE Initiative is available at [www.strobe-statement.org](http://www.strobe-statement.org).
